# Supplementary material for: A critical role for heme synthesis and succinate in the regulation of pluripotent states transitions
Source: eLife journal article supplement (doi:10.7554/elife.78546), 2023-07-10

48h

|       | 2iL |   | Transition |   |   |   |   |
|-------|-----|---|------------|---|---|---|---|
| SA    | -   | - | +          | + | + | - | - |
| Hemin | -   | - | -          | + | + | + | - |
| MEK   | +   | - | -          | - | + | - | + |

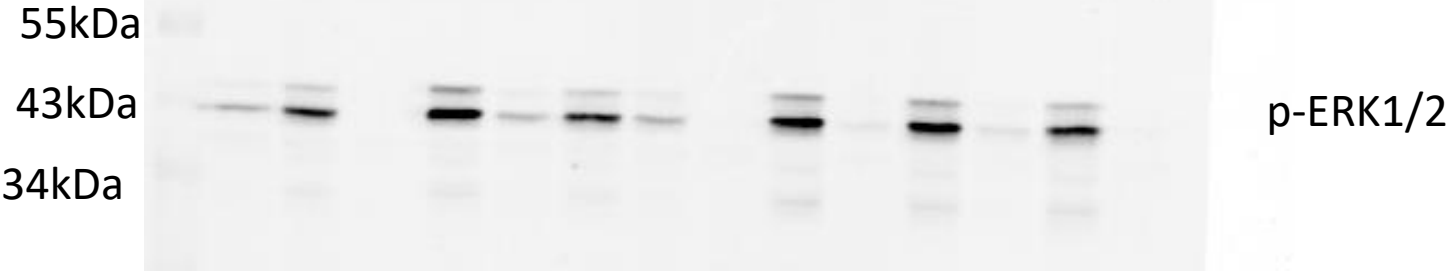

48h

|       | 2iL |   | Transition |   |   |   |   |
|-------|-----|---|------------|---|---|---|---|
| SA    | -   | - | +          | + | + | - | - |
| Hemin | -   | - | -          | + | + | + | - |
| MEK   | +   | - | -          | - | + | - | + |

55kDa

43kDa

34kDa

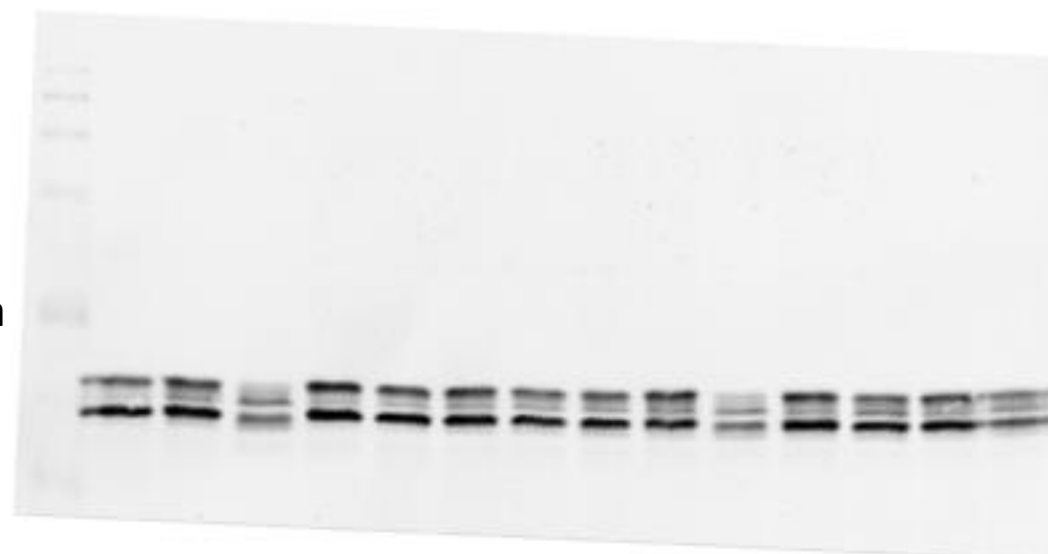

ERK1/2

48h

|       | 2iL |   | Transition |   |   |   |   |
|-------|-----|---|------------|---|---|---|---|
| SA    | -   | - | +          | + | + | - | - |
| Hemin | -   | - | -          | + | + | + | - |
| MEK   | +   | - | -          | - | + | - | + |

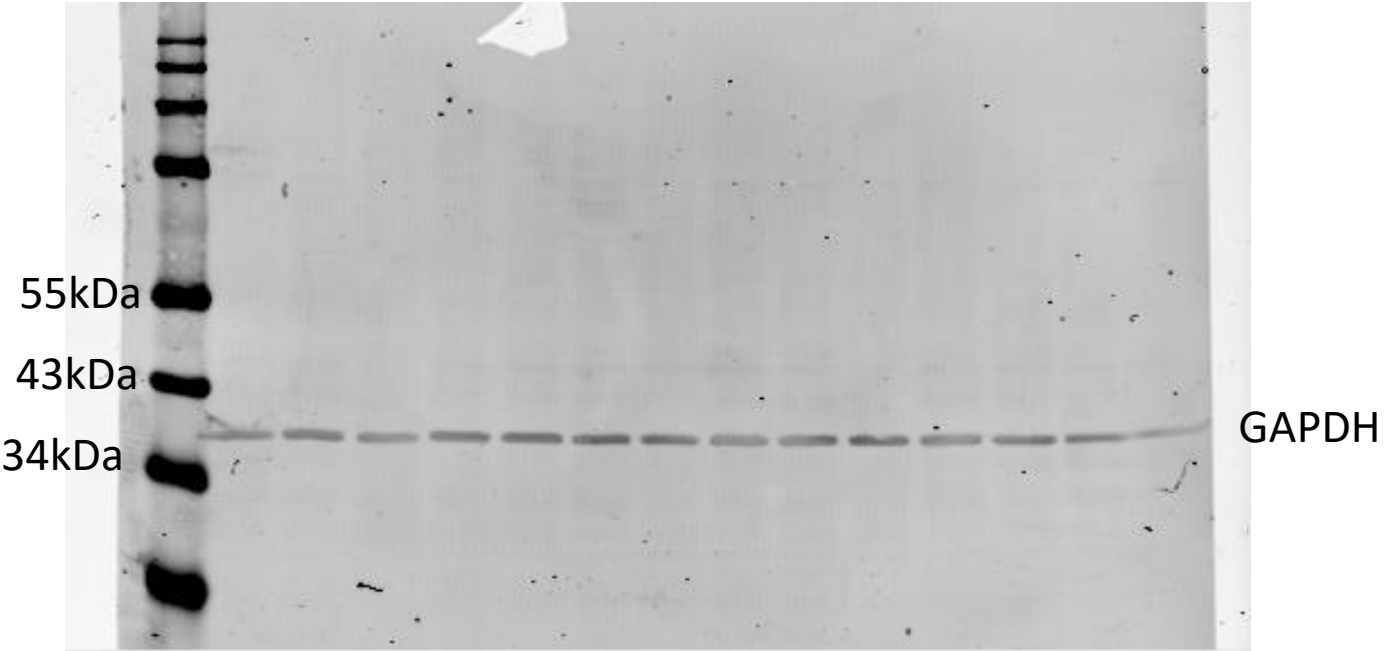

Supplement: supp [file elife-78546-supp-v1.zip]
