# Supplementary figures and images for: A critical role for heme synthesis and succinate in the regulation of pluripotent states transitions
Source: eLife journal article supplement (doi:10.7554/elife.78546), 2023-07-10

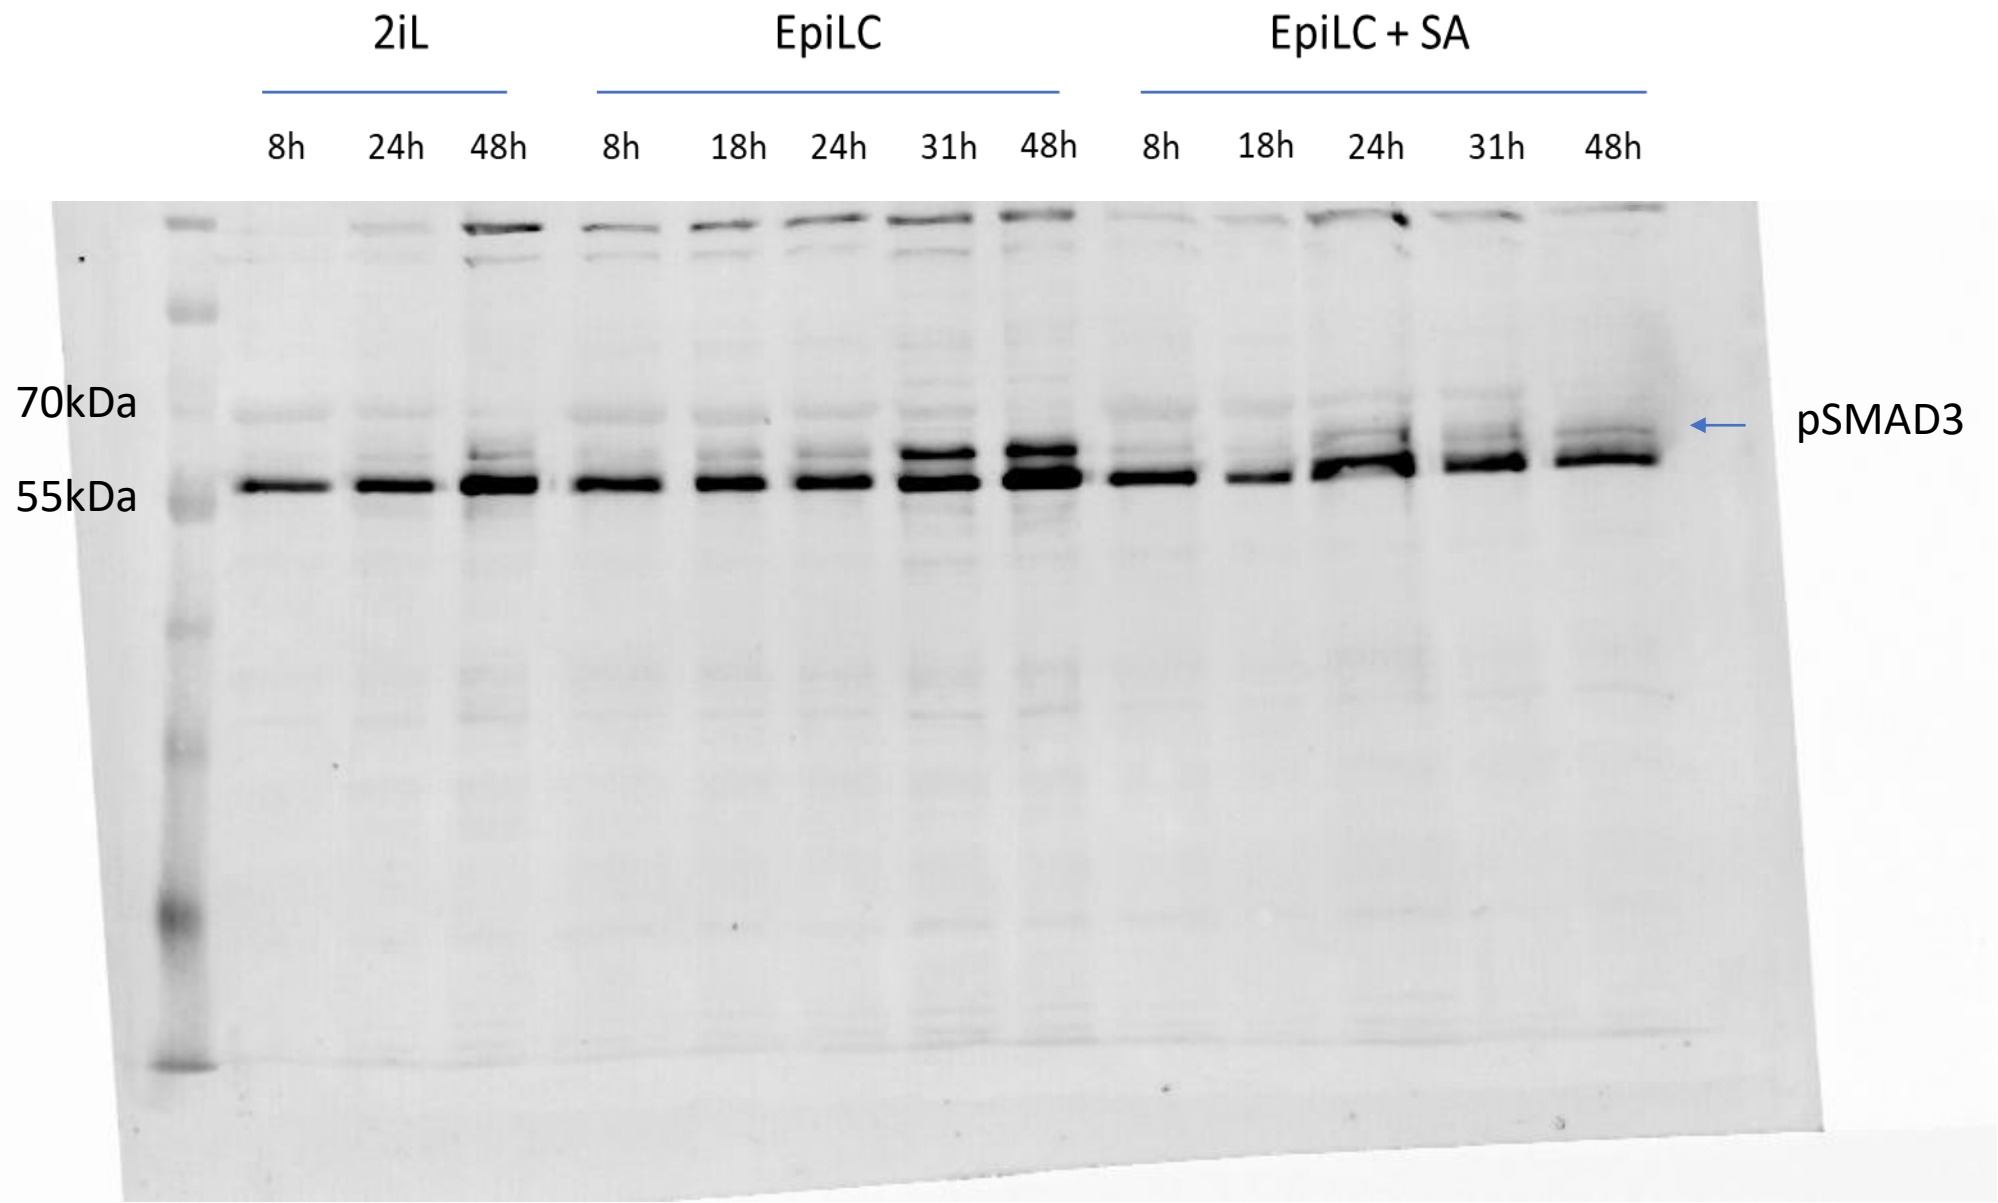

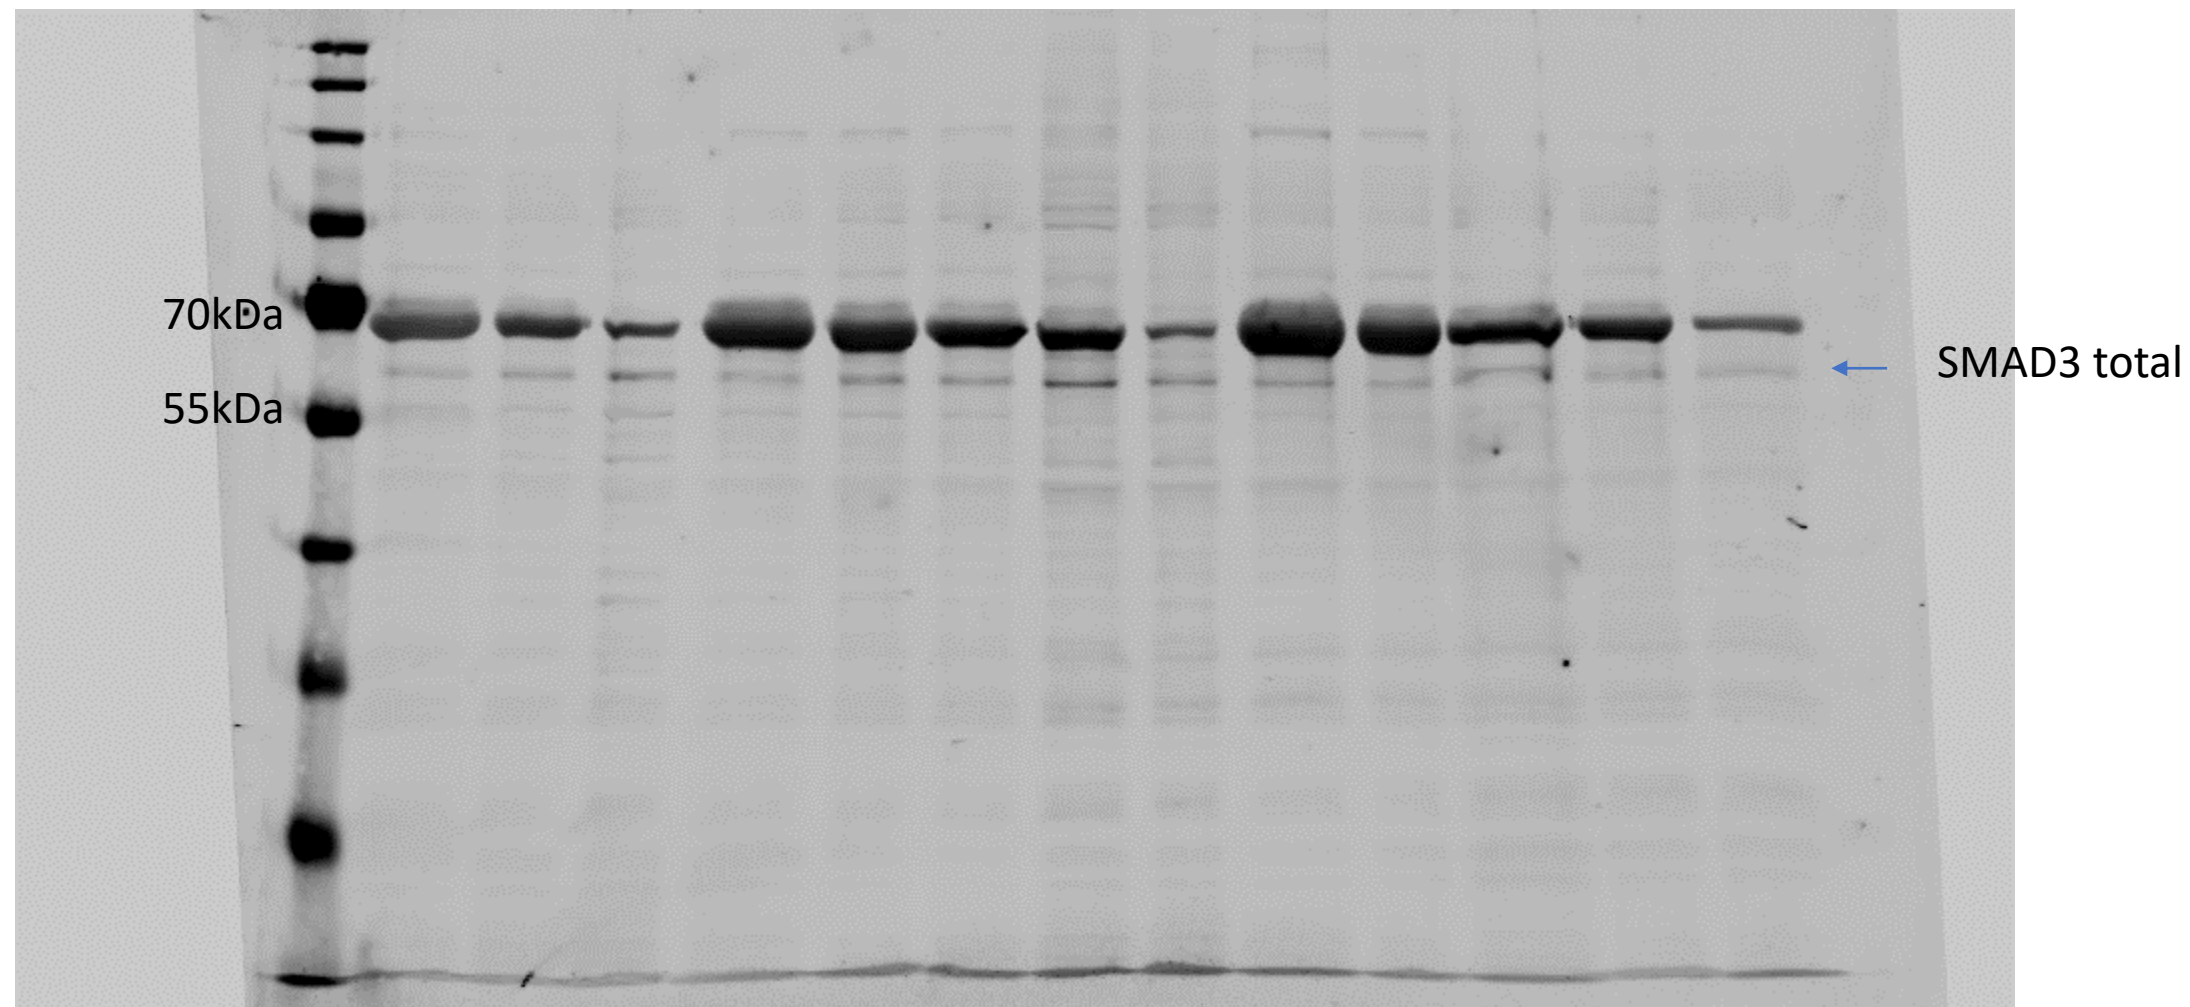

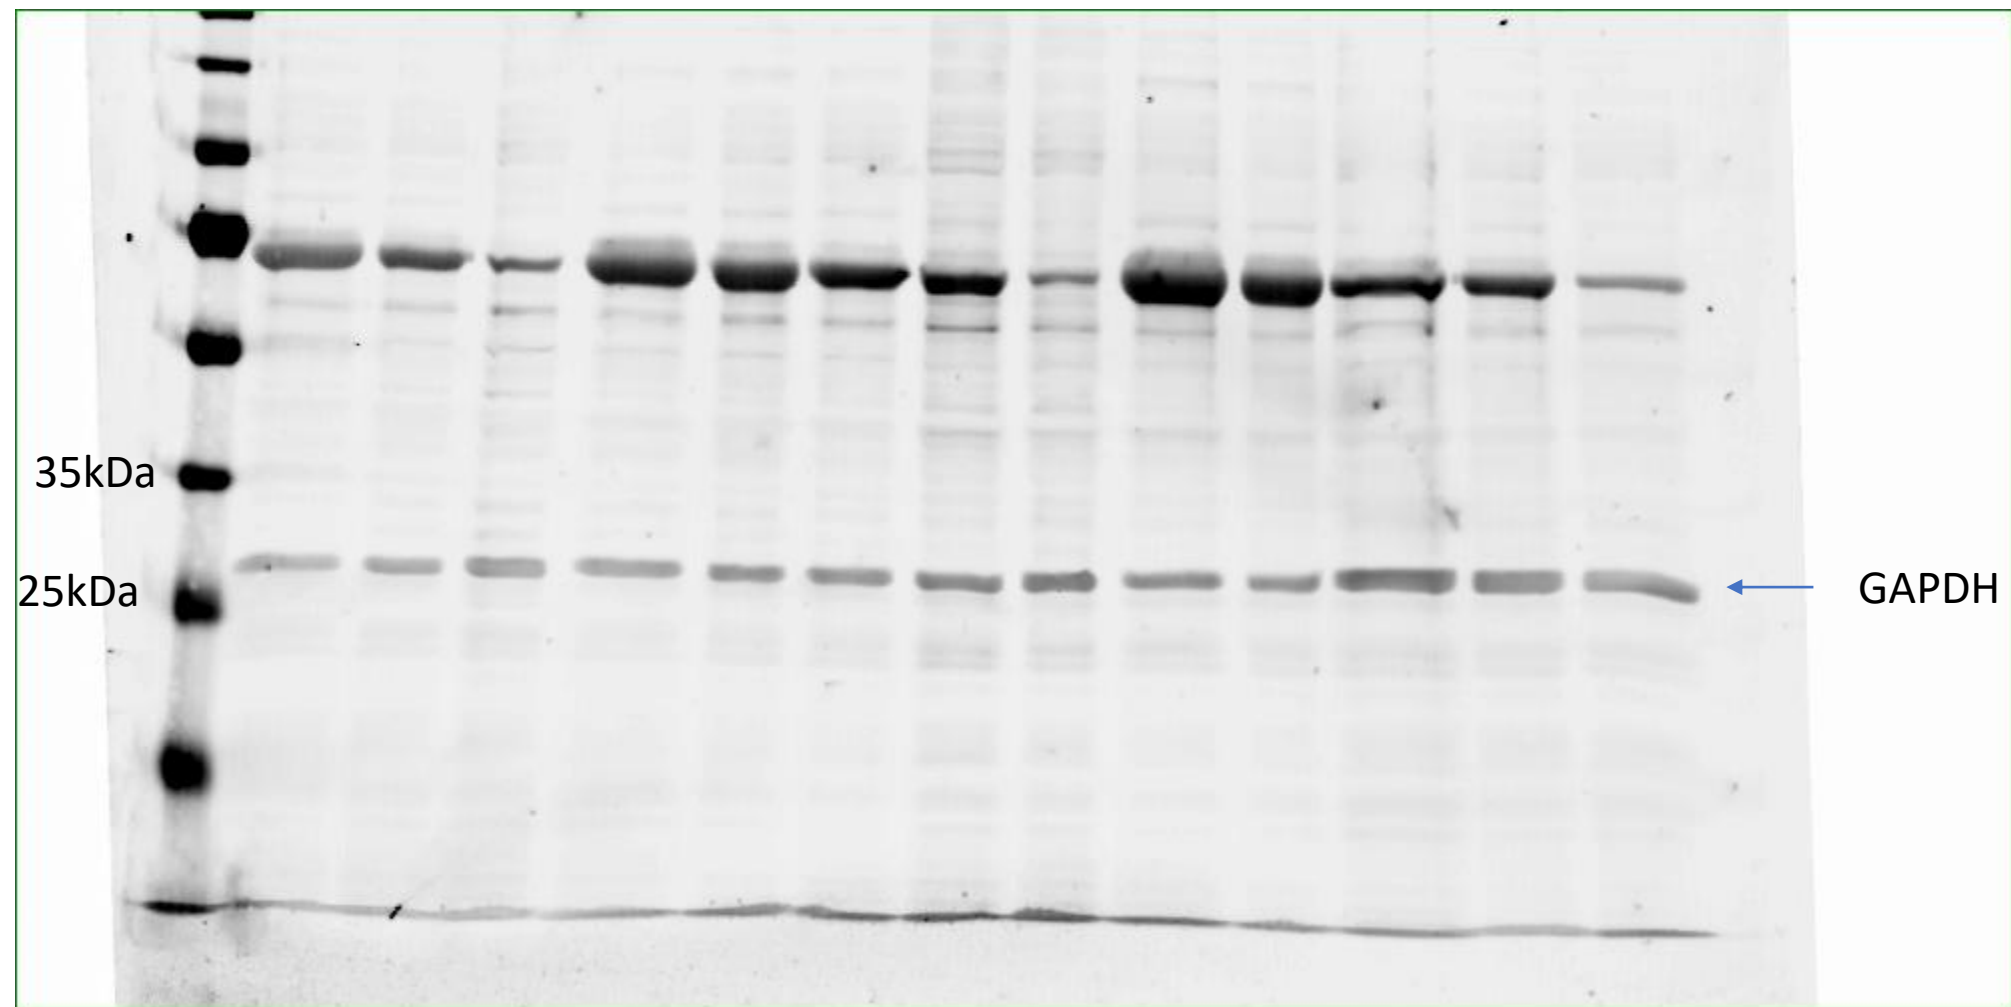

Supplement: fig2-data1 [file elife-78546-fig2-data1-v2.zip]

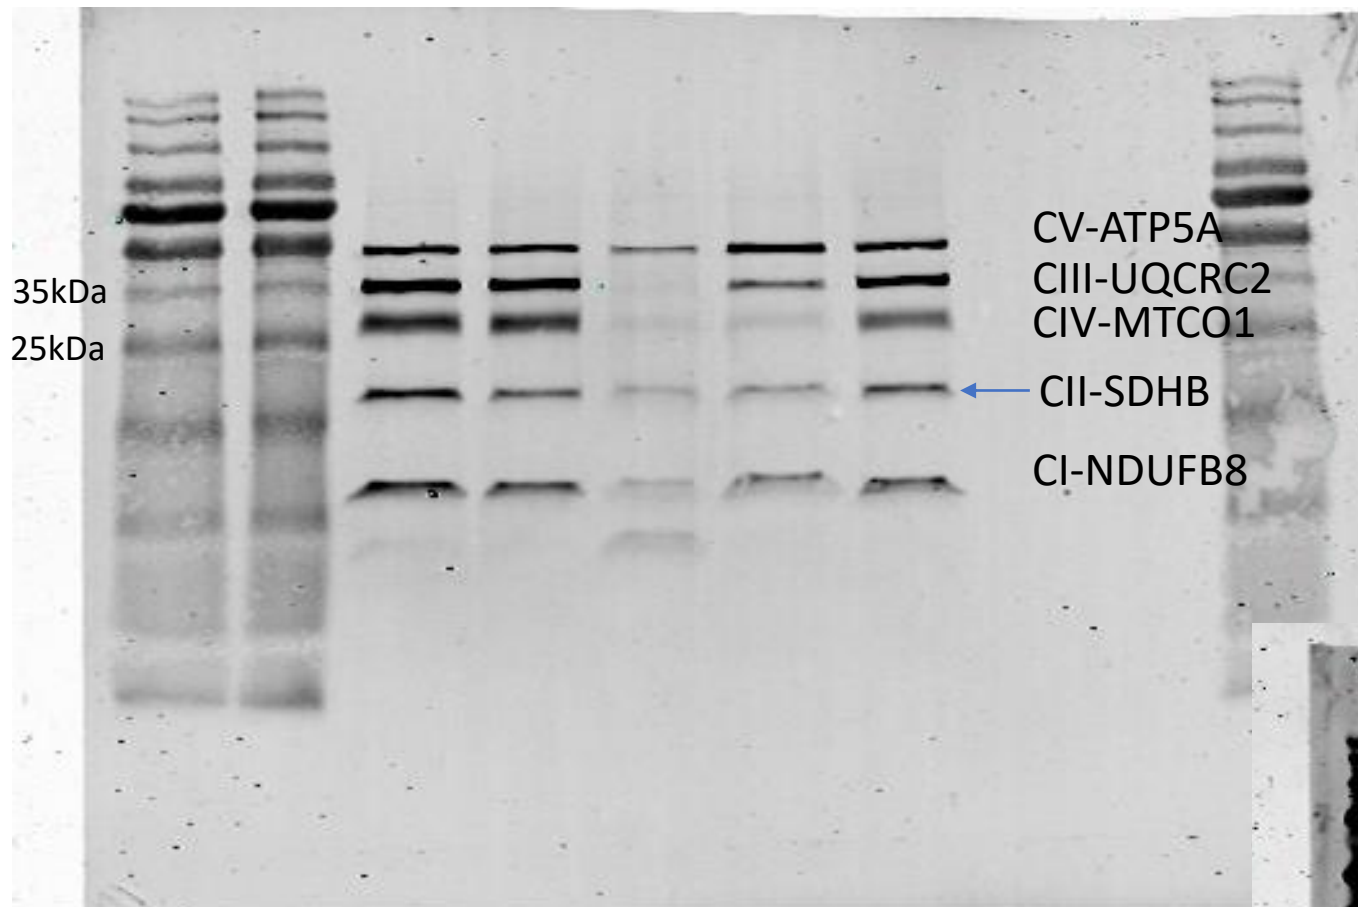

|       | 2iL | EpiLC |   |   |
|-------|-----|-------|---|---|
| SA    | -   | +     | - | + |
| Hemin | -   | -     | - | + |

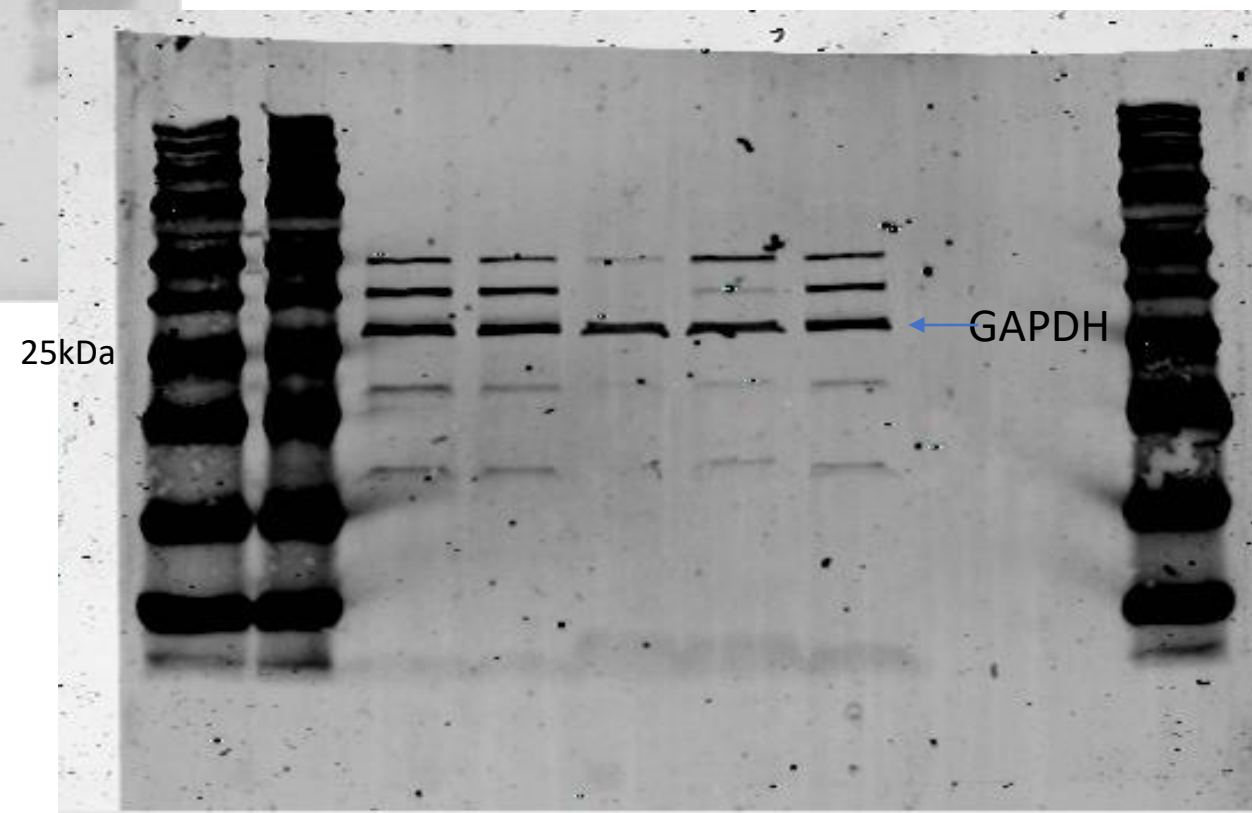

Supplement: fig2-data2 [file elife-78546-fig2-data2-v2.zip]

Puromycin-labeled peptides

|        | 2iL | EpiLC 48h |   |   |
|--------|-----|-----------|---|---|
| SA:    | -   | -         | + | + |
| Hemin: | -   | -         | - | + |

180 kDa  
130 kDa  
95 kDa  
72 kDa  
55 kDa  
43 kDa  
34 kDa  
26 kDa

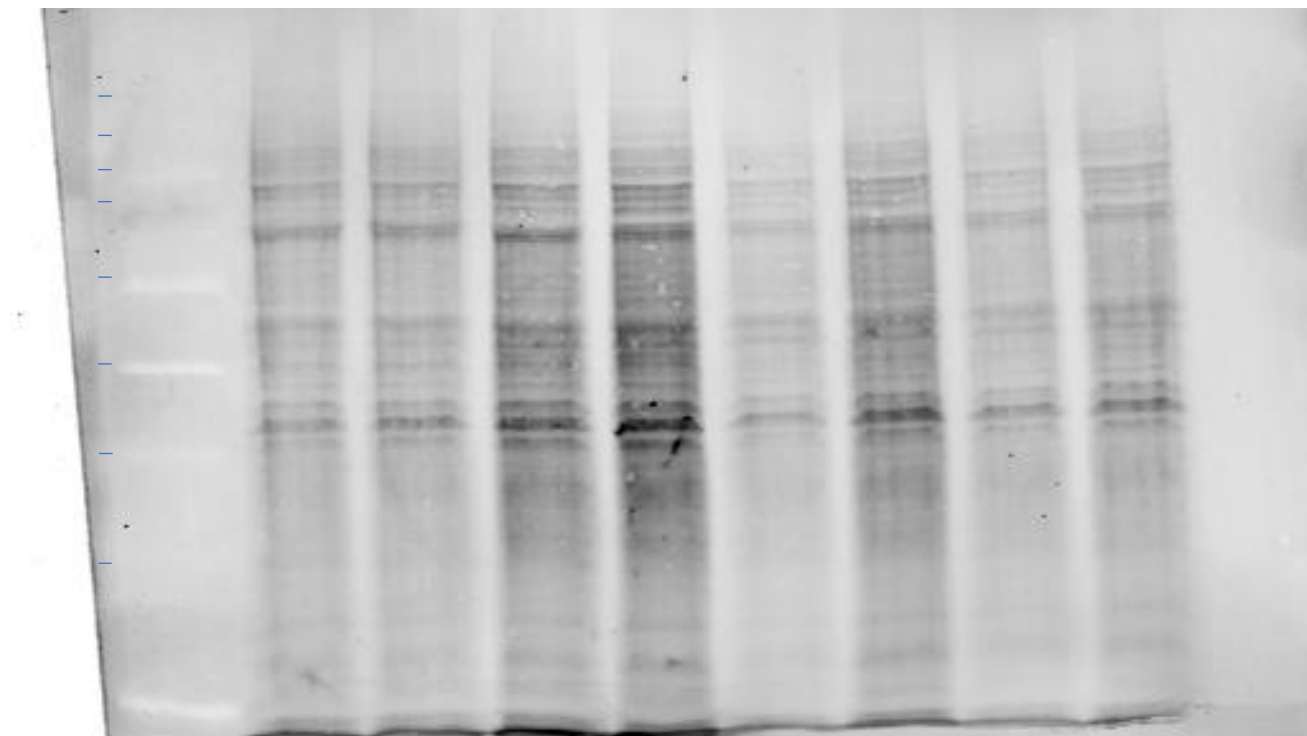

17 kDa

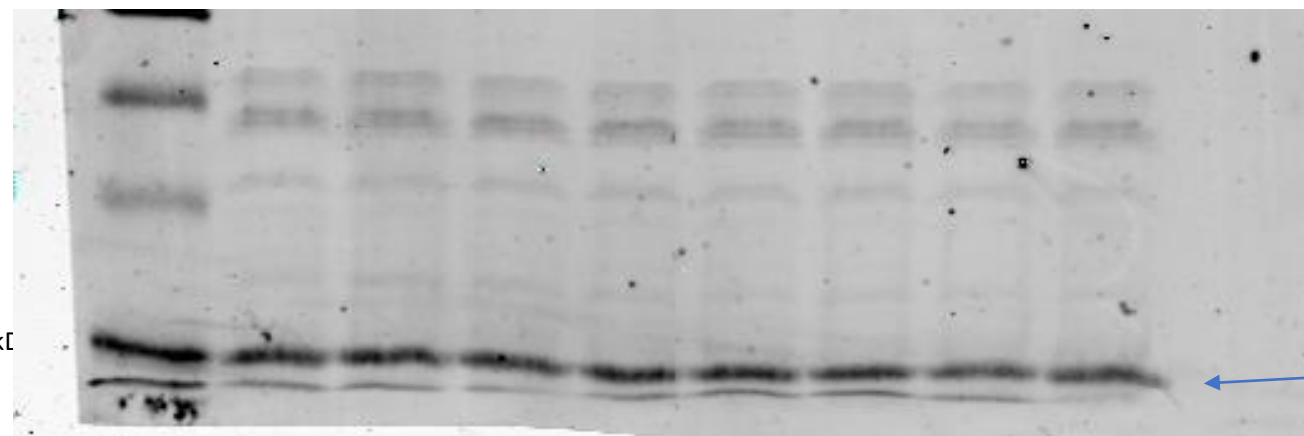

H3

Supplement: supp [file elife-78546-supp-v1.zip]

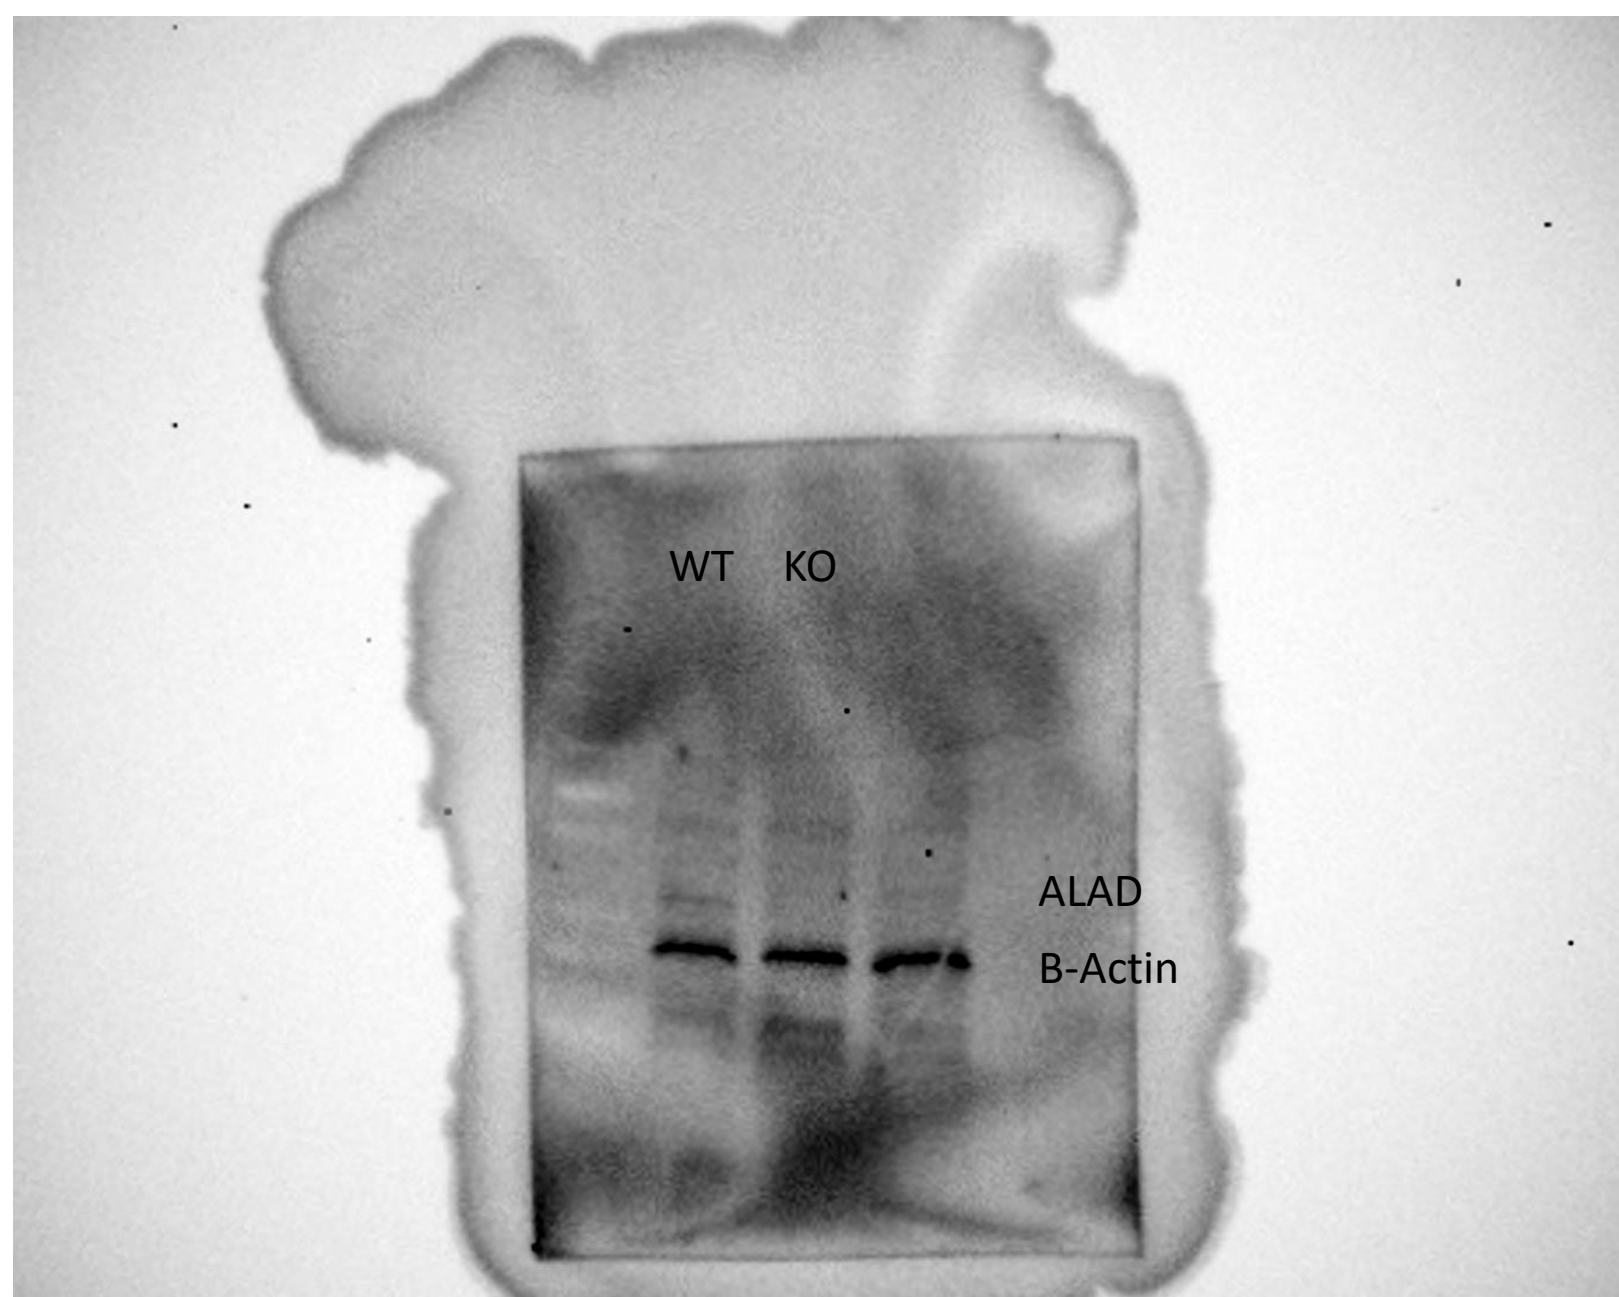

Supplement: supp [file elife-78546-supp-v1.zip]

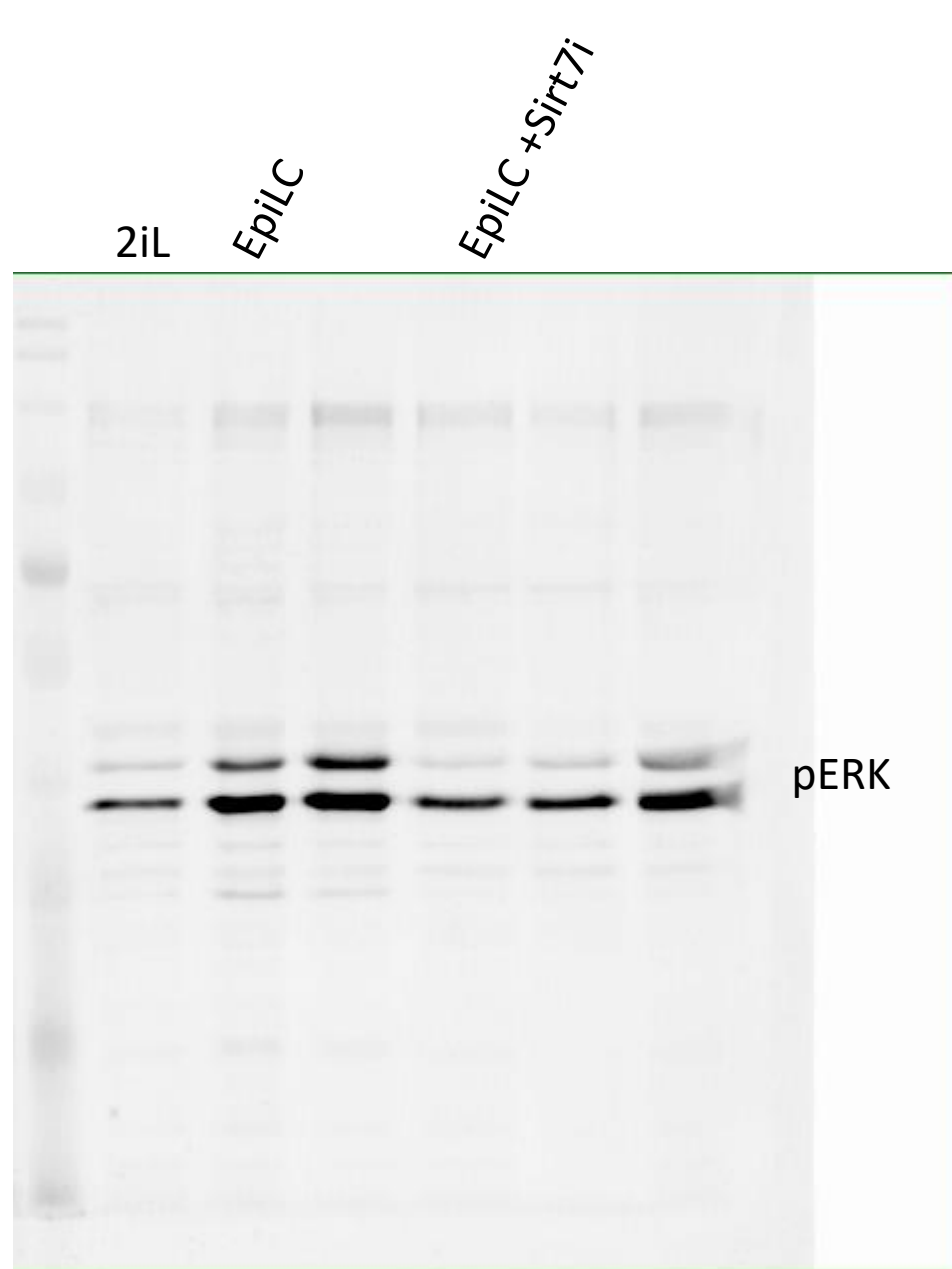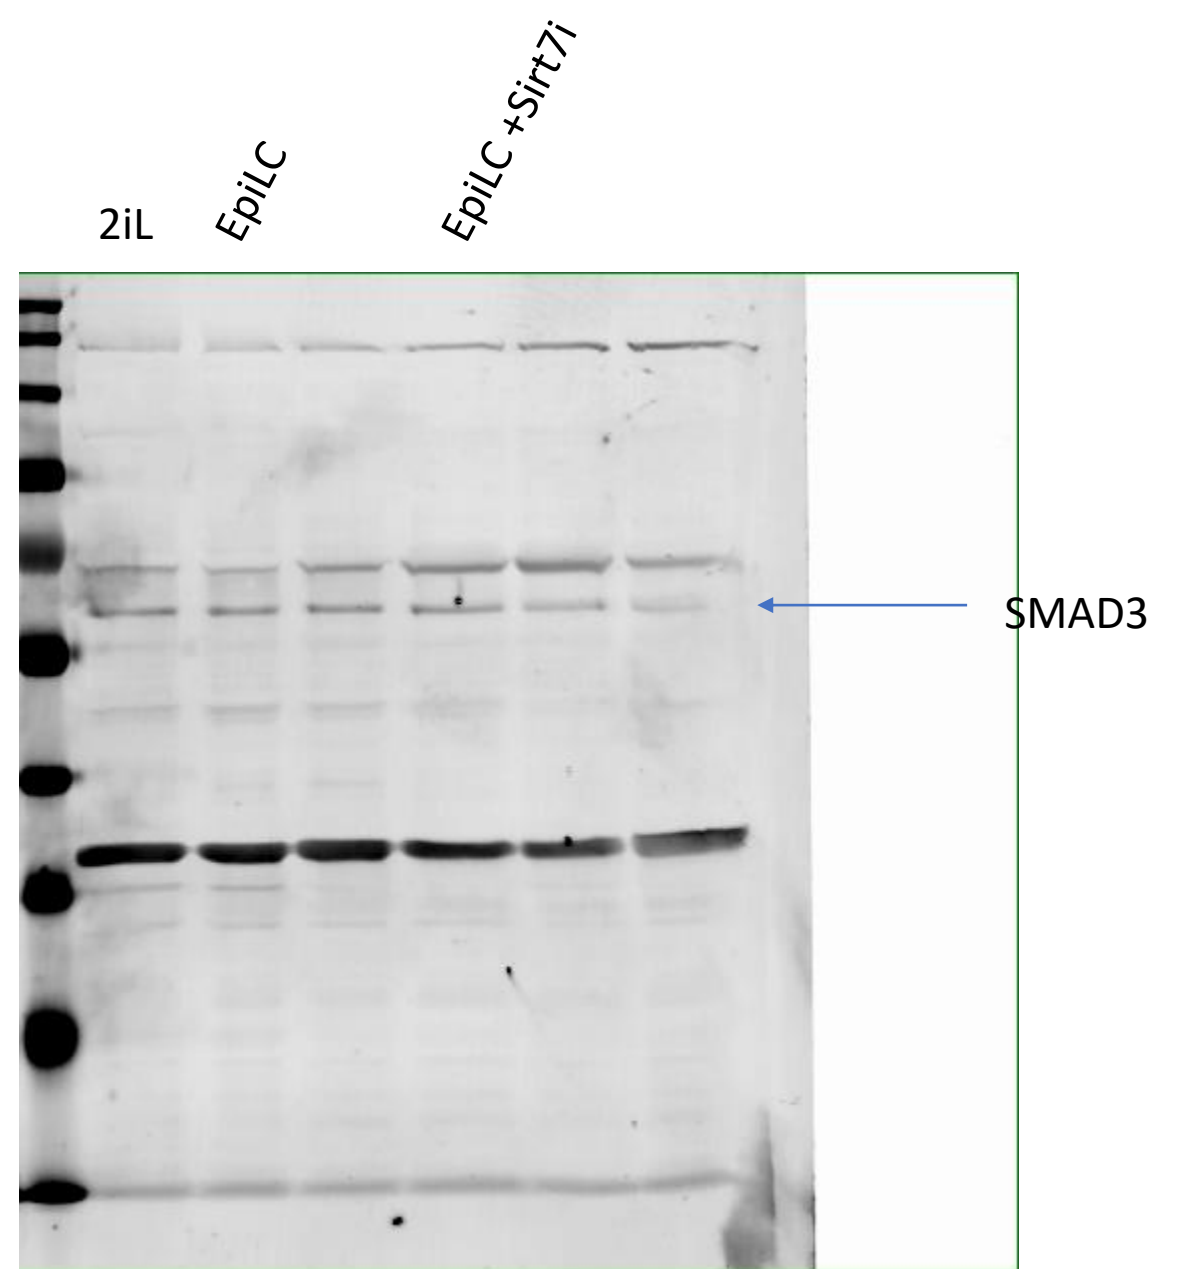

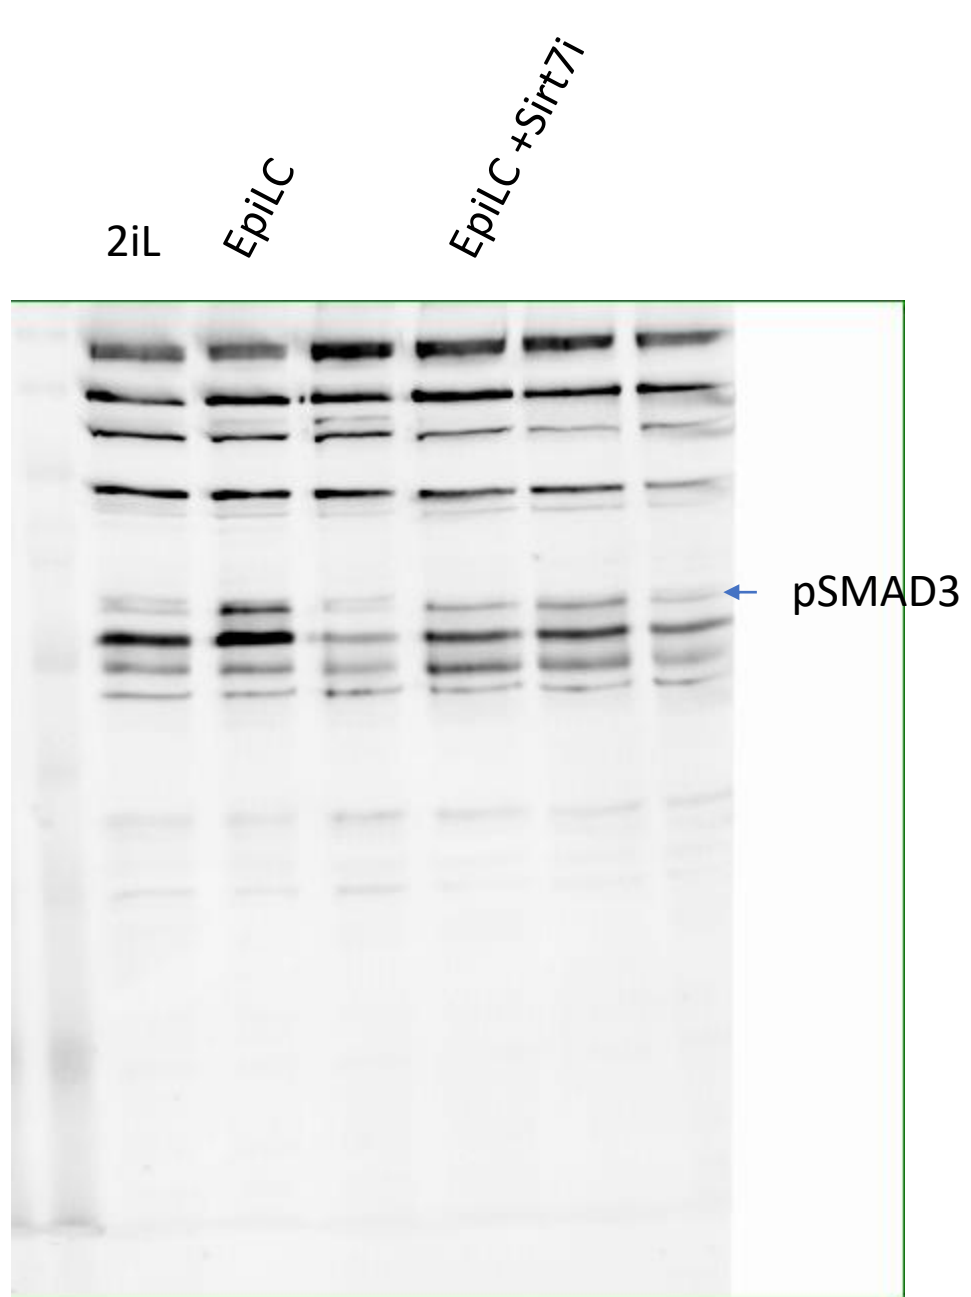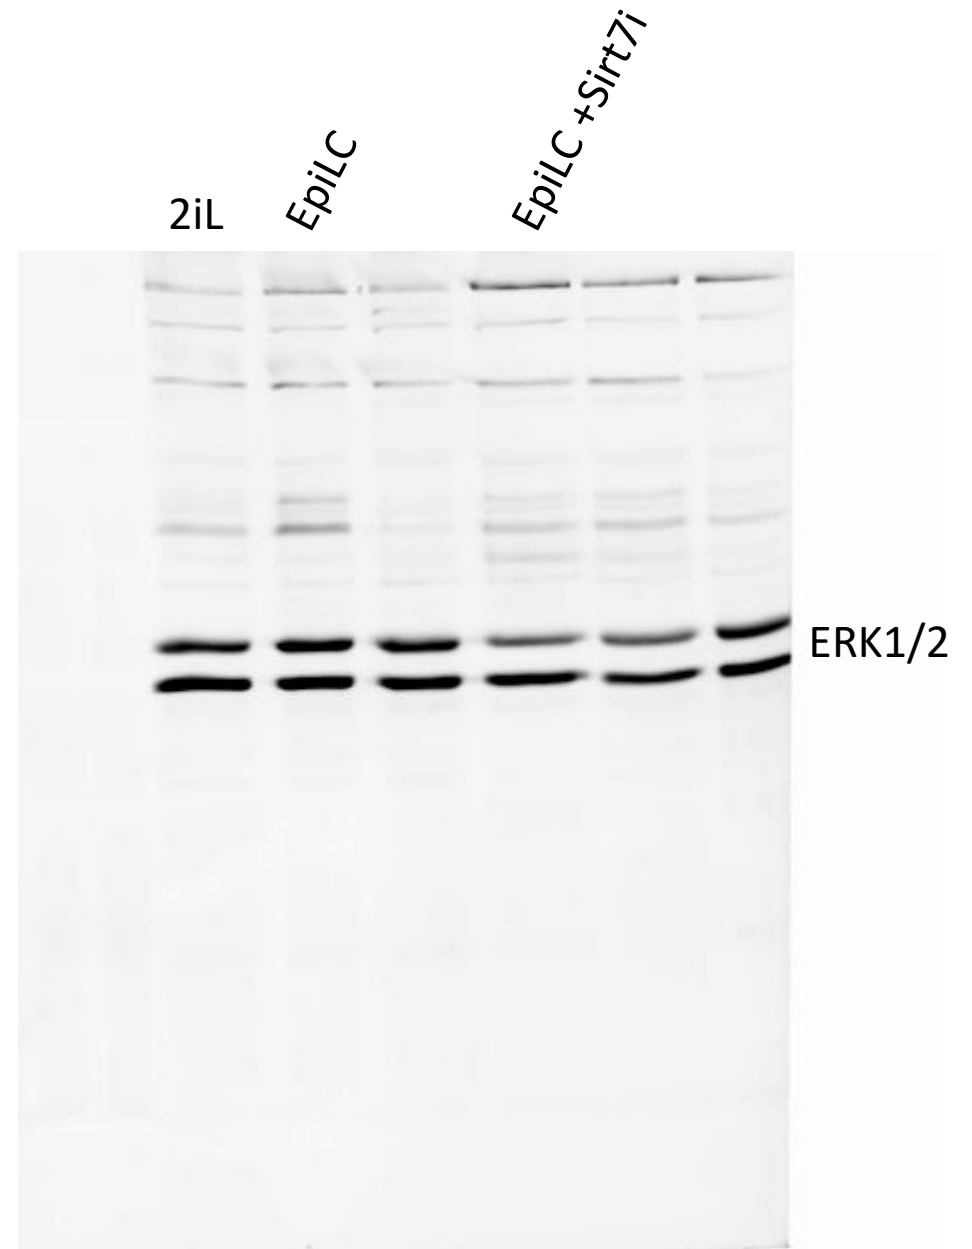

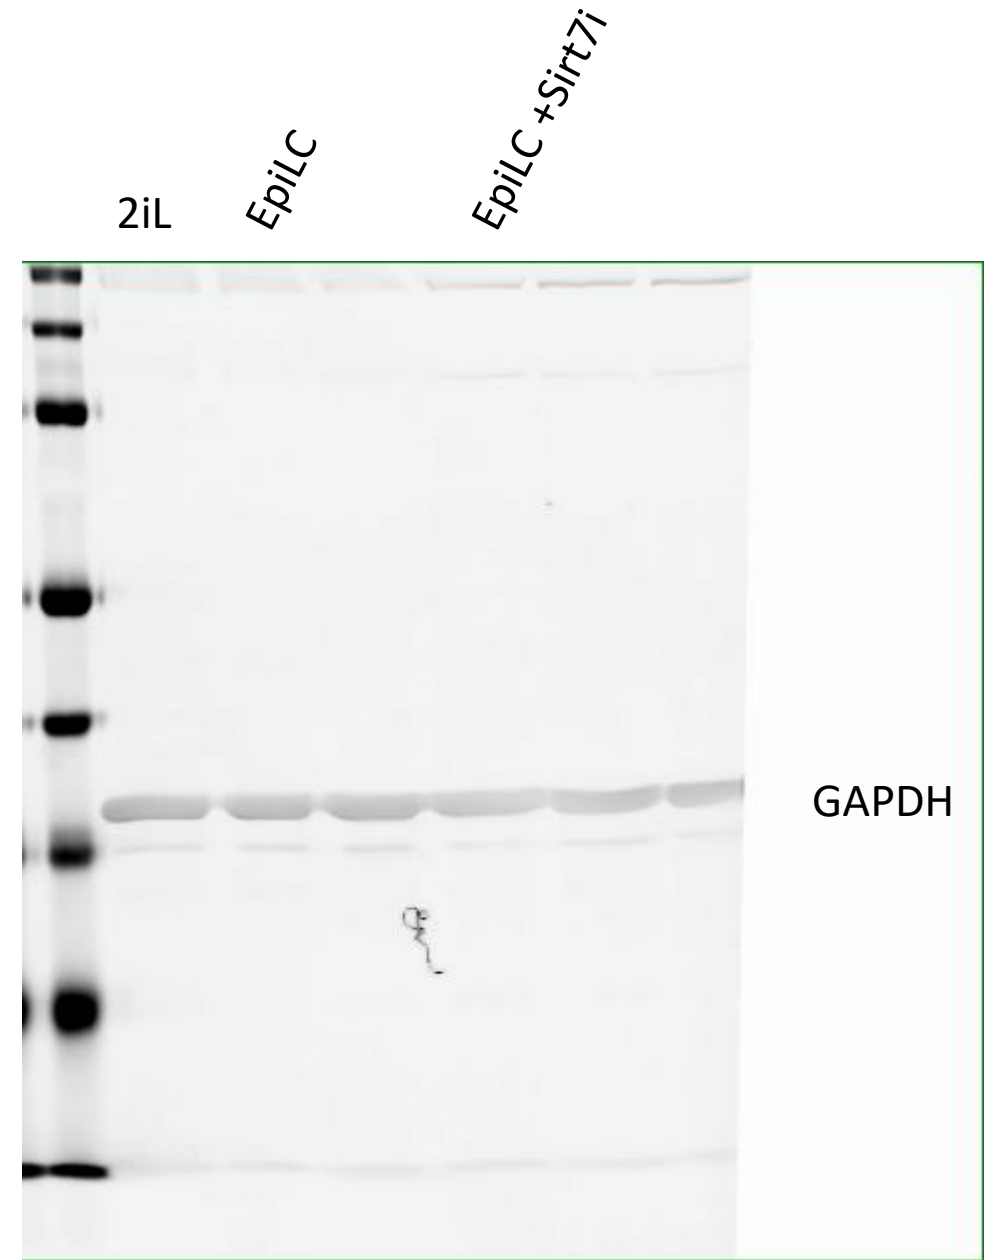

Supplement: supp [file elife-78546-supp-v1.zip]

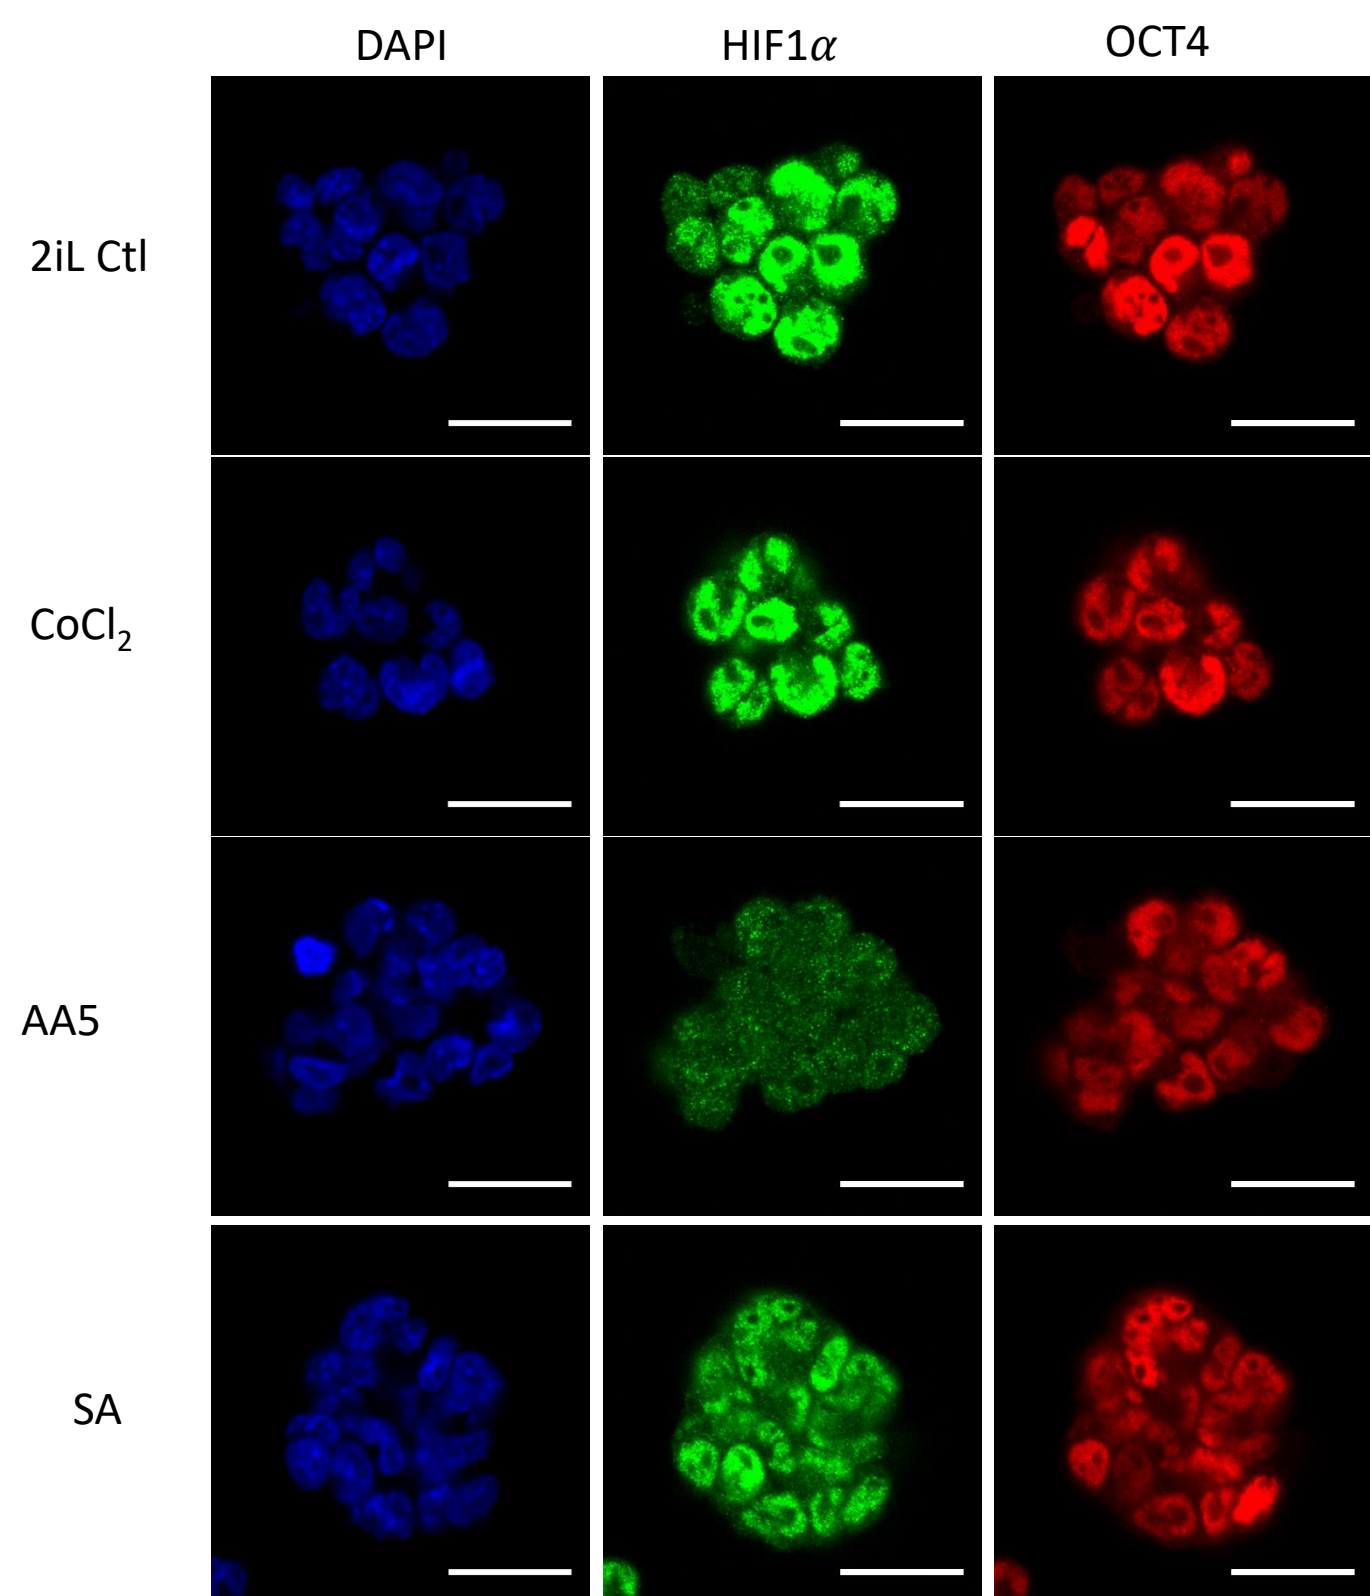

Supplement: supp [file elife-78546-supp-v1.zip]

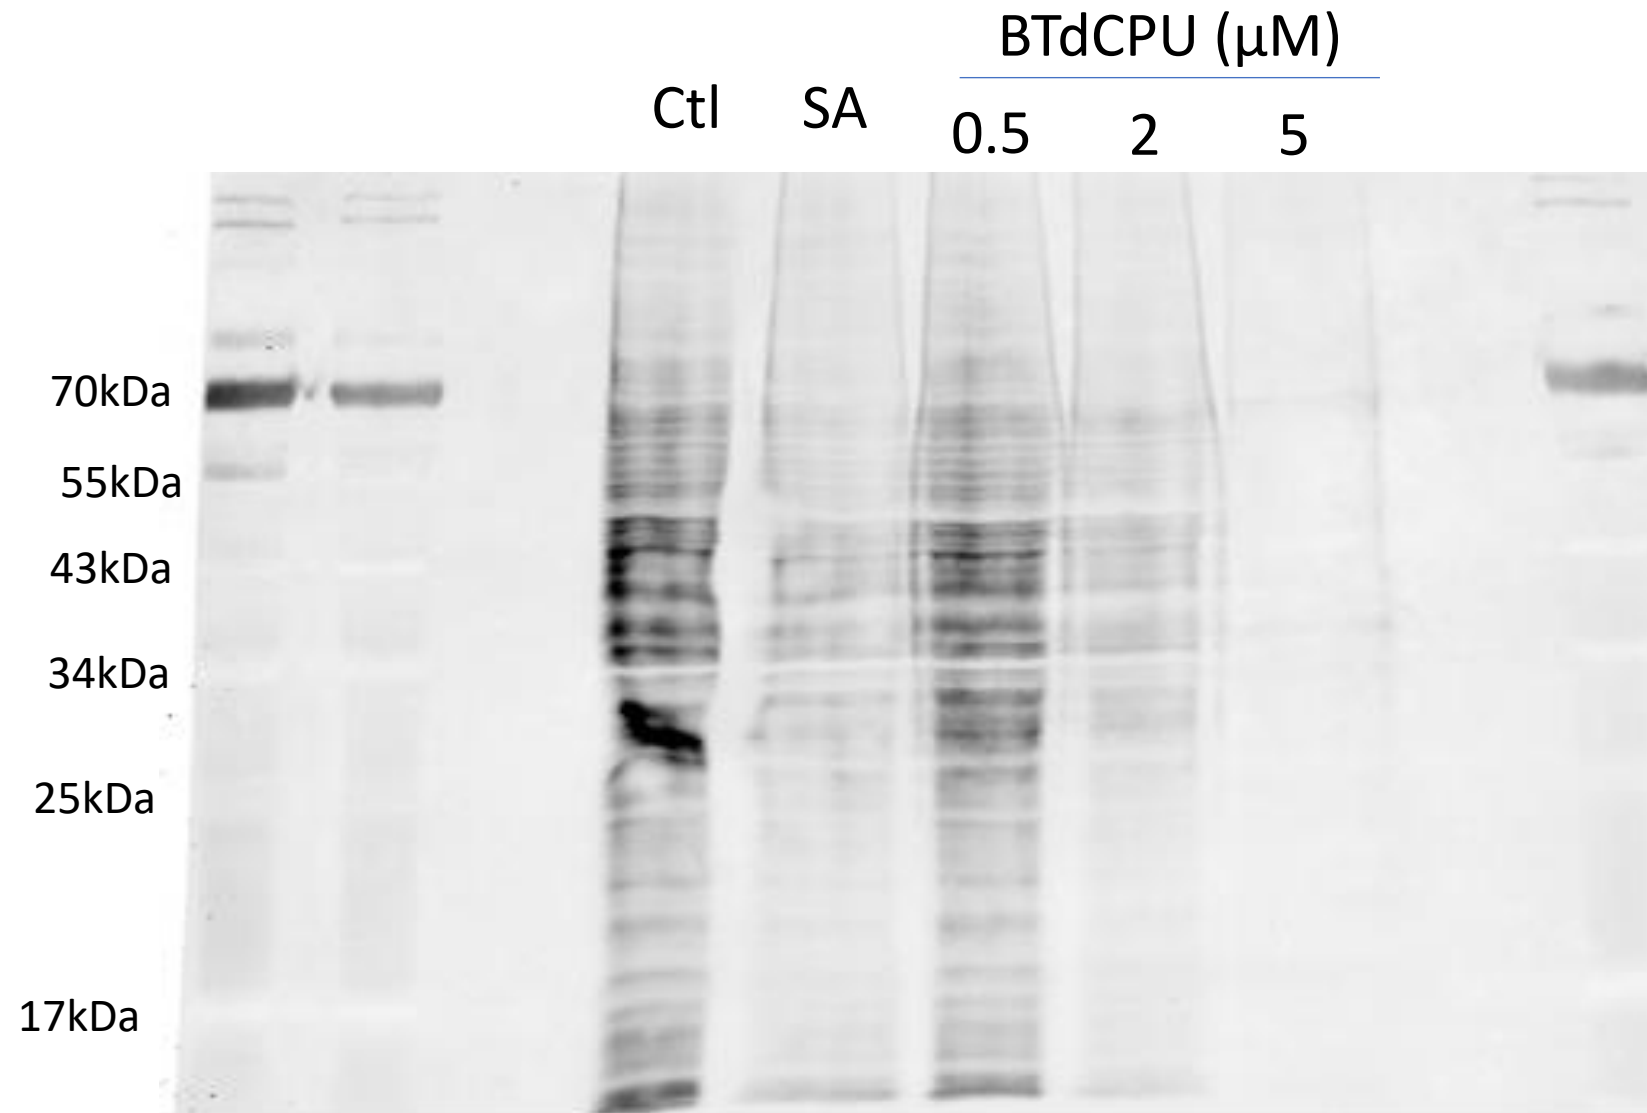

Puromycin-labelled peptides

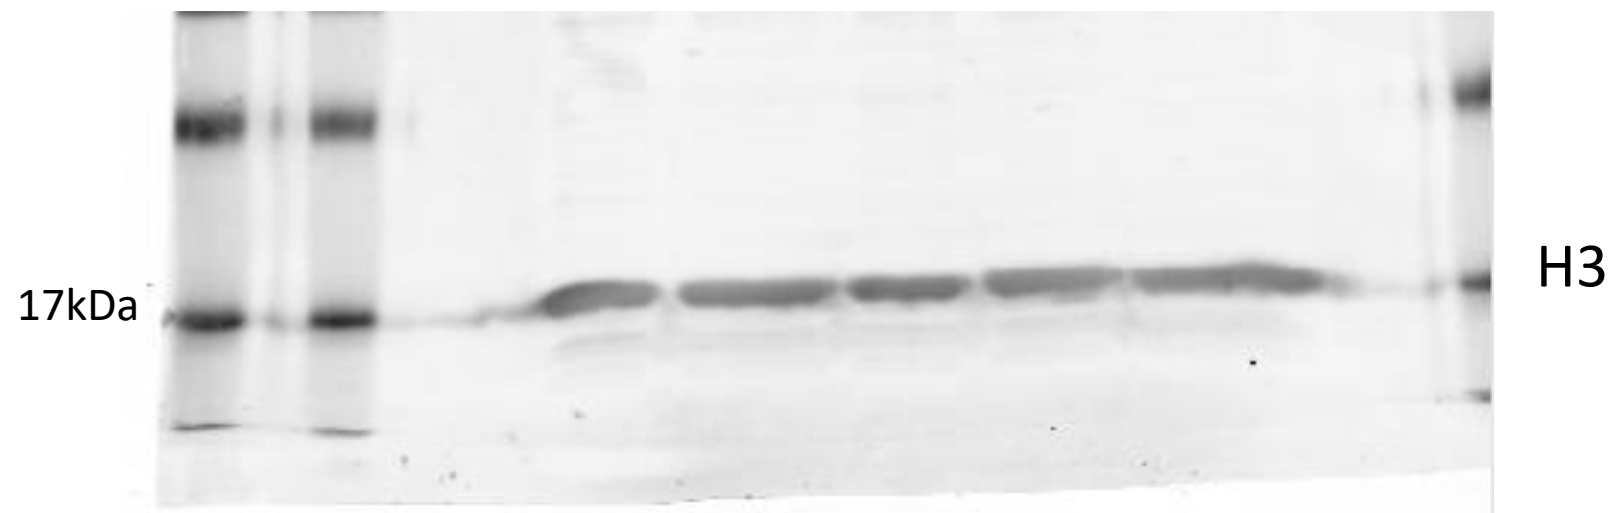

Supplement: supp [file elife-78546-supp-v1.zip]

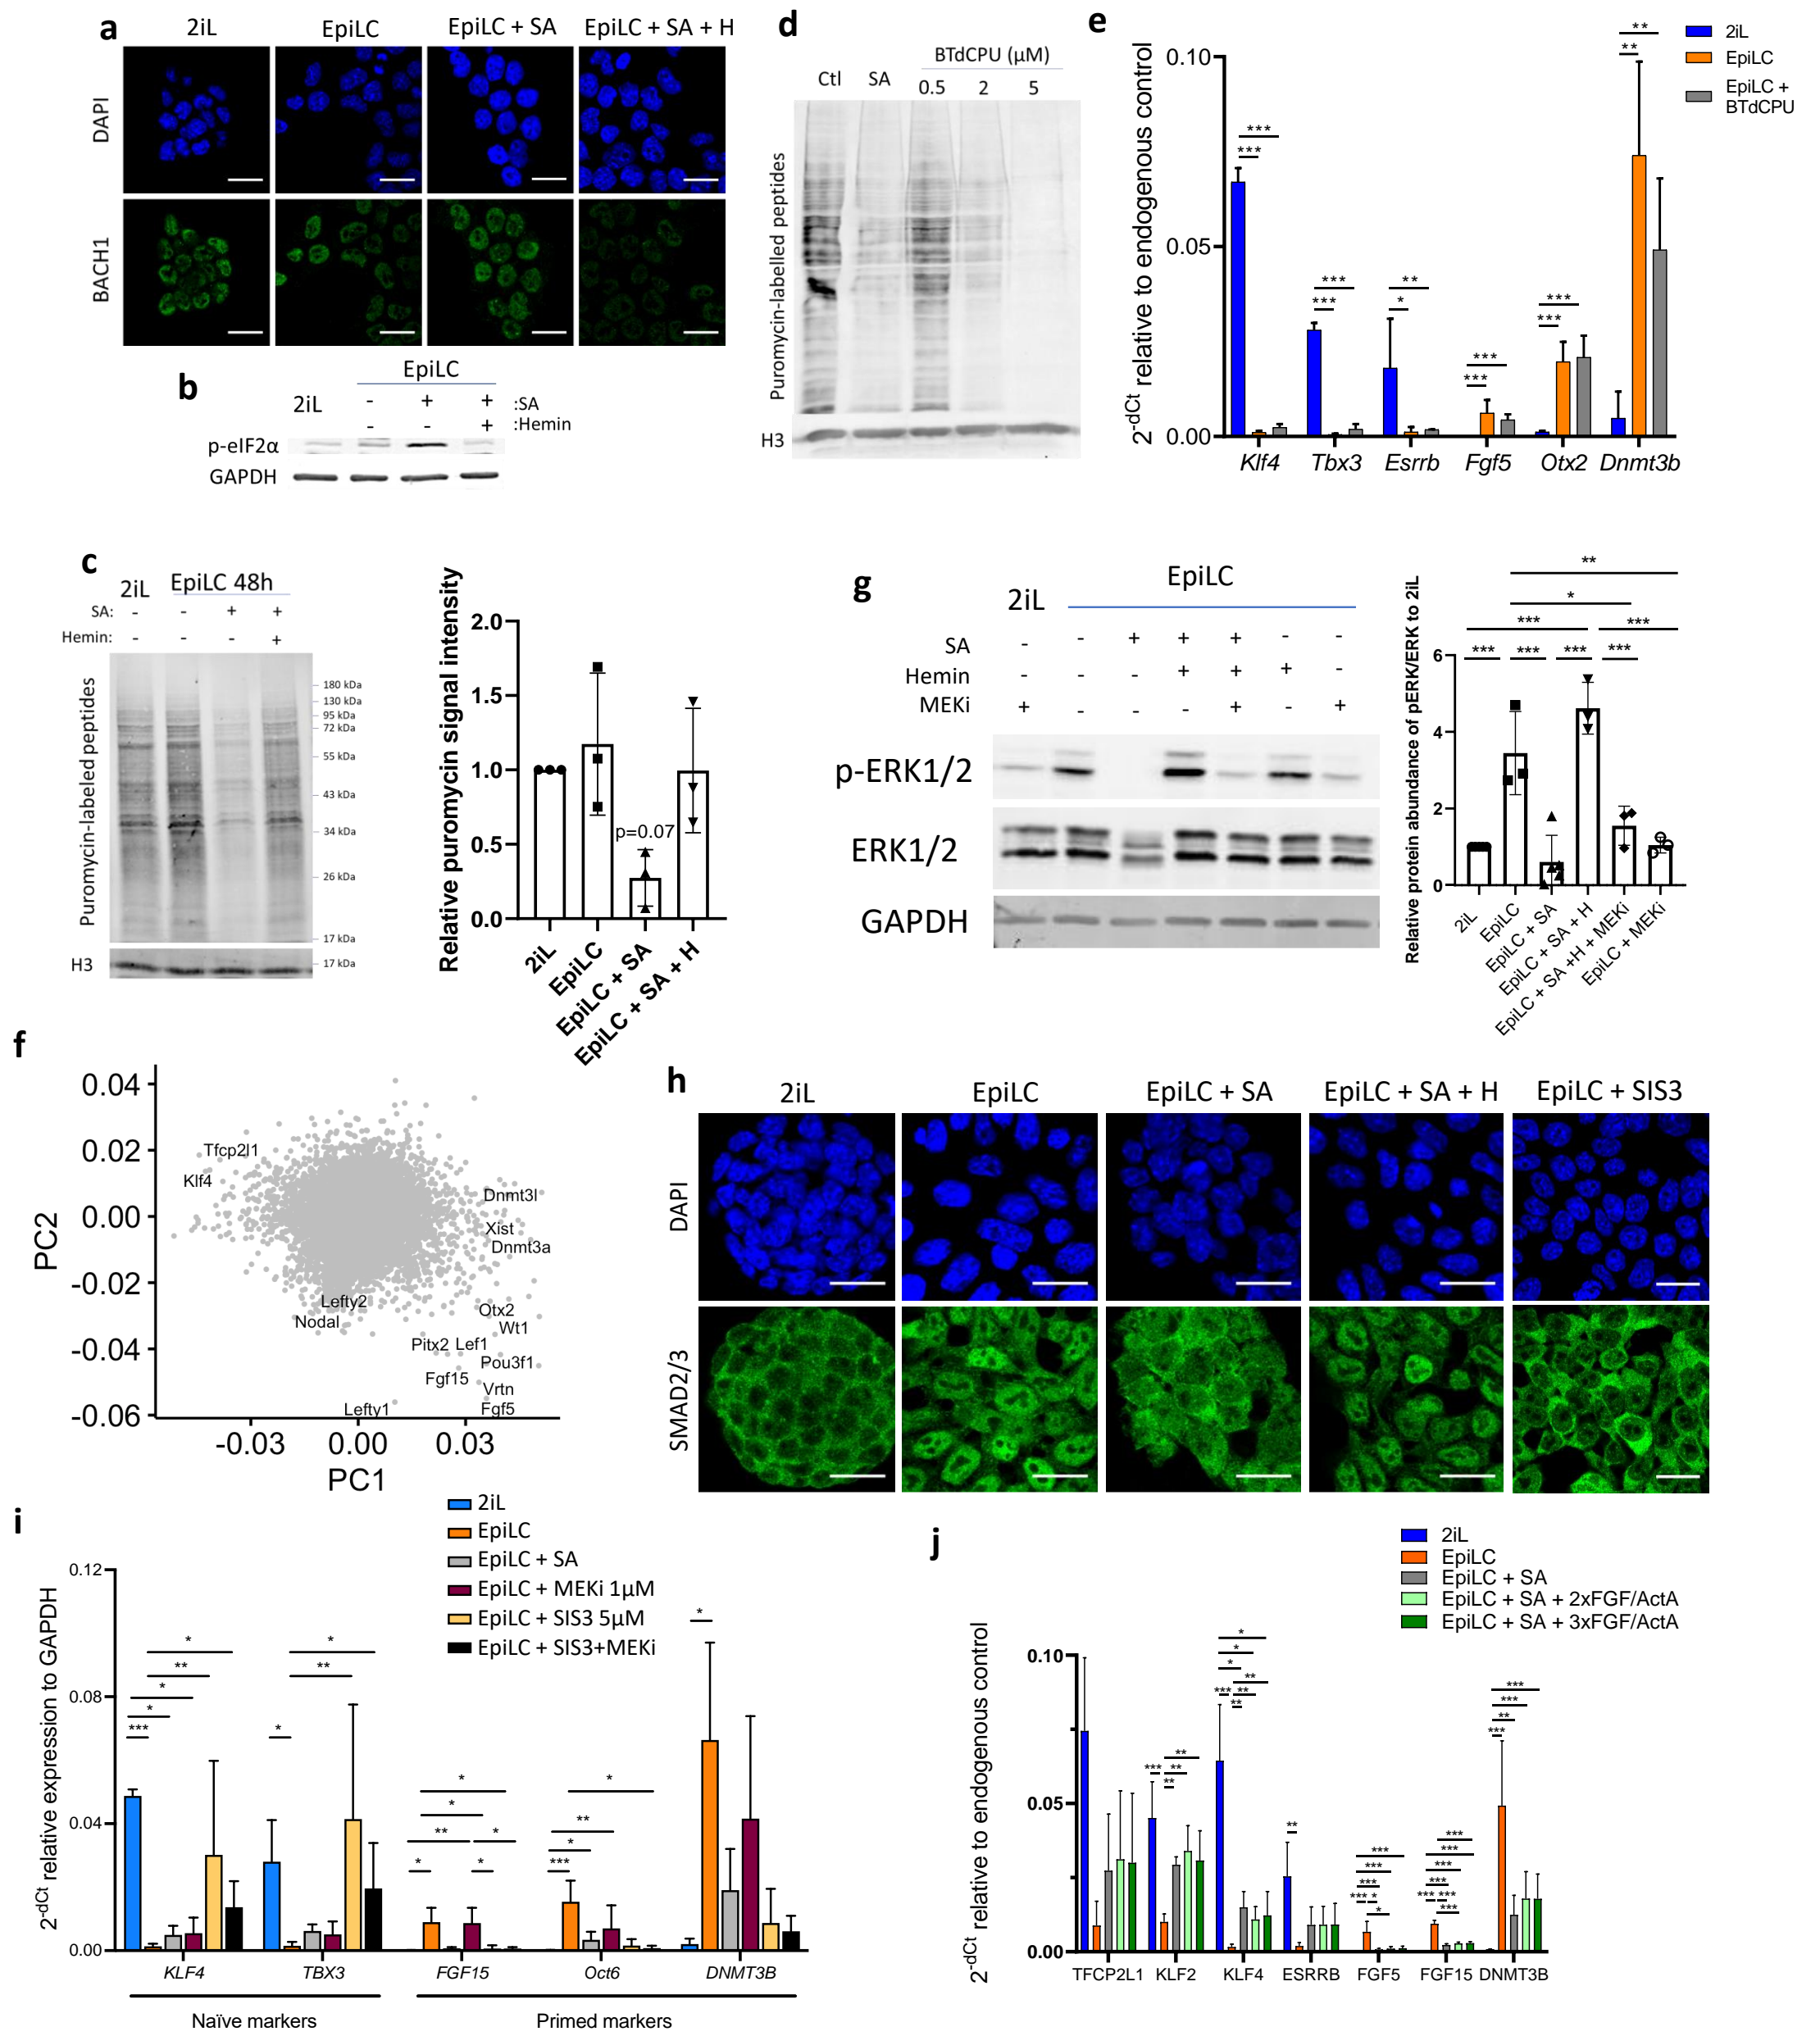

Supplement: supp [file elife-78546-supp-v1.zip]

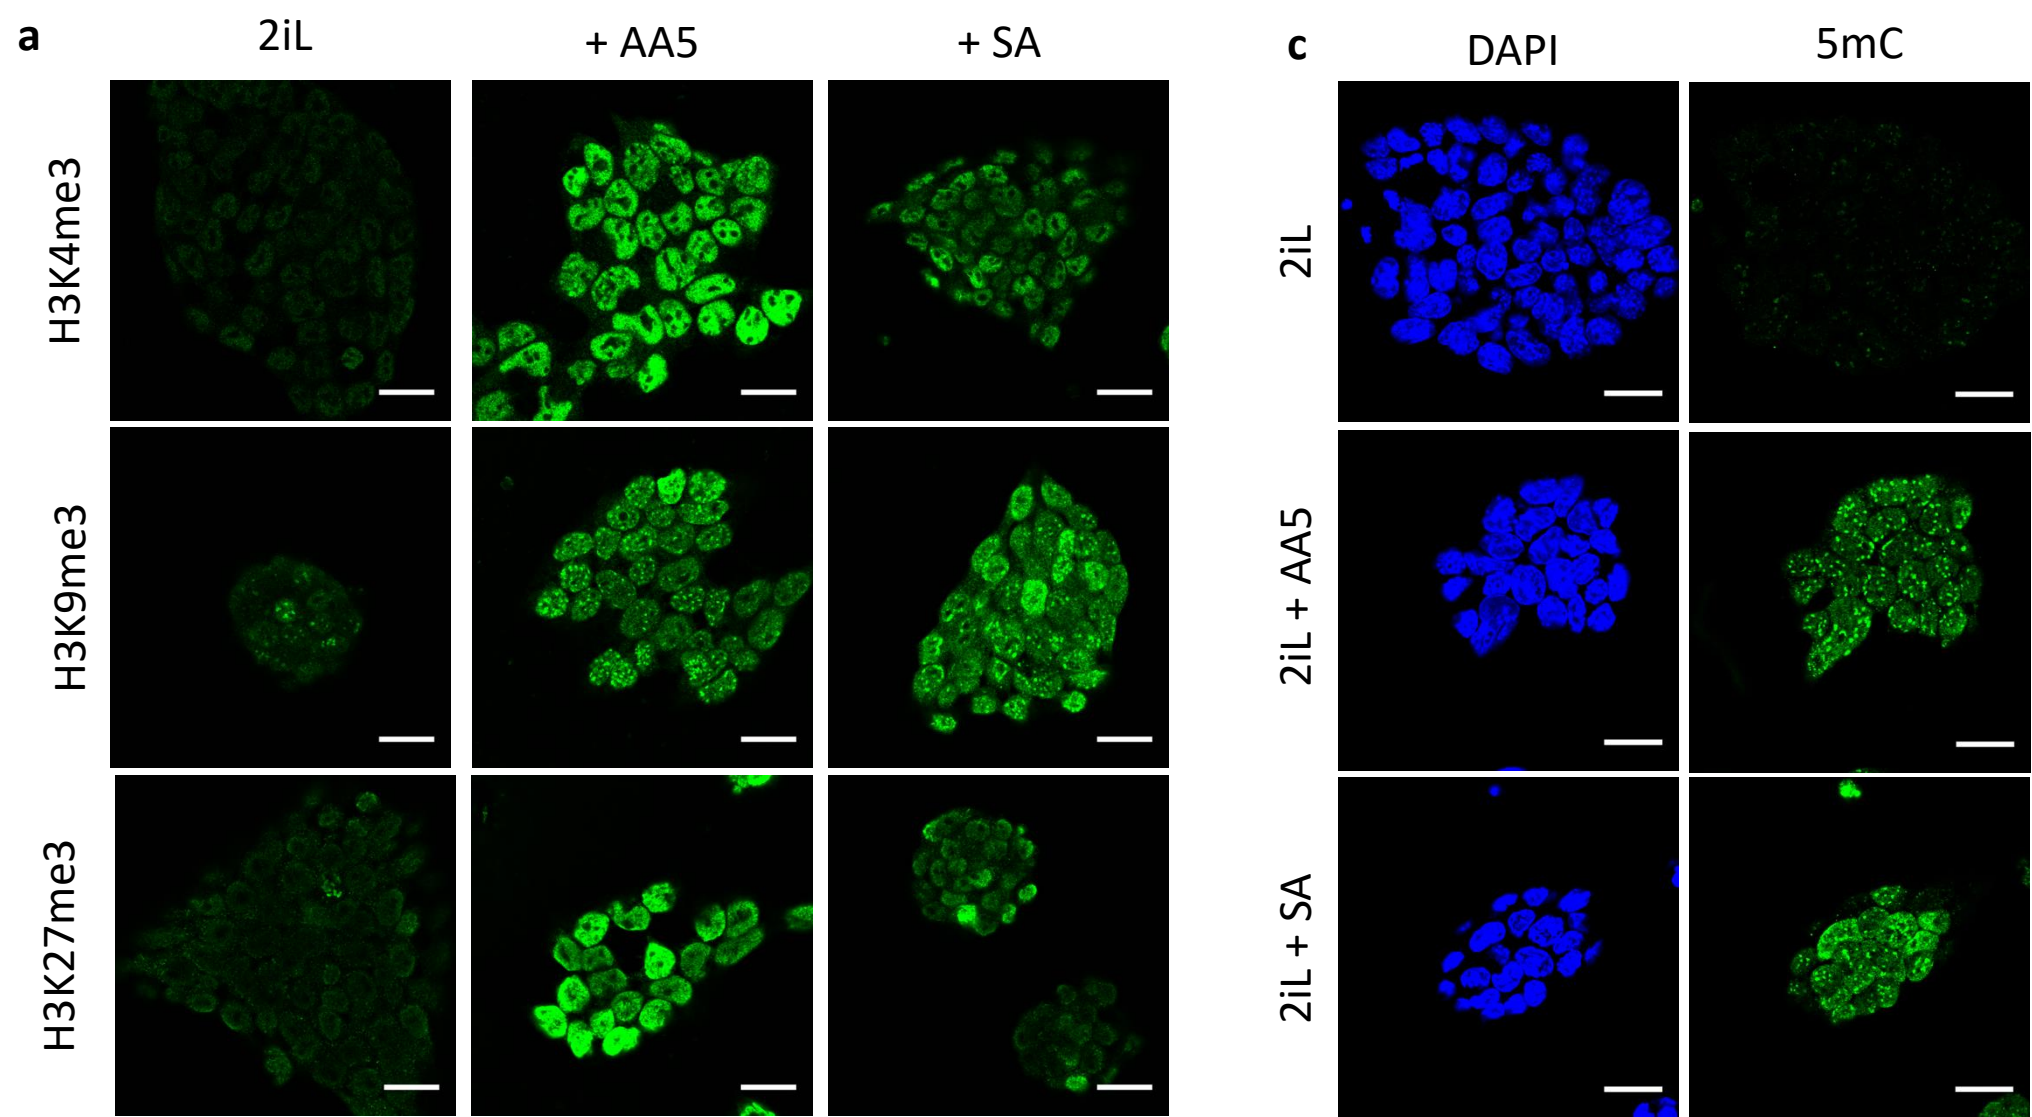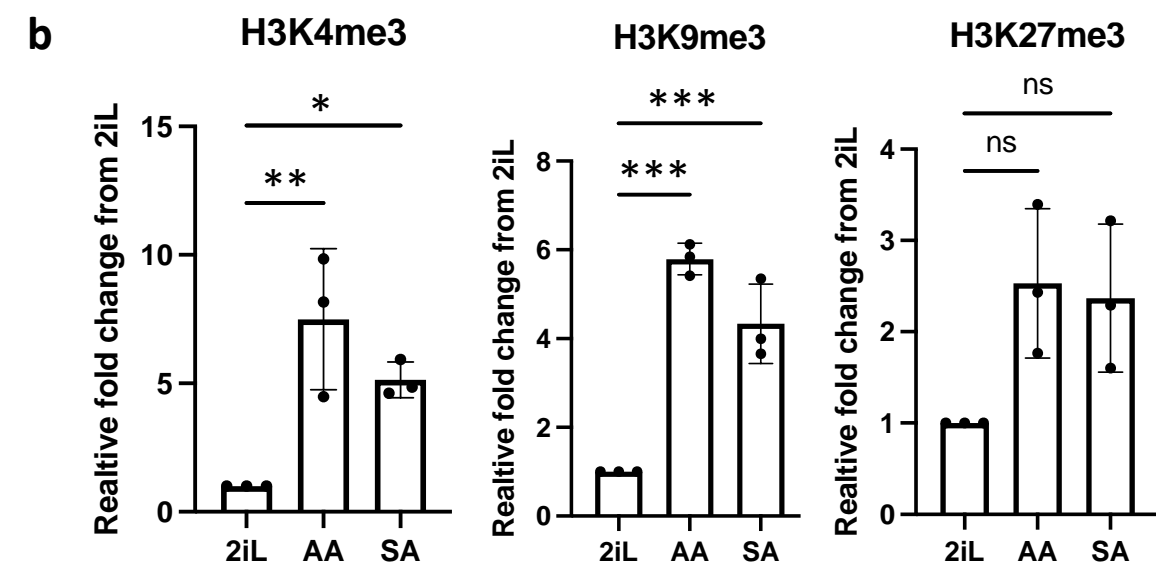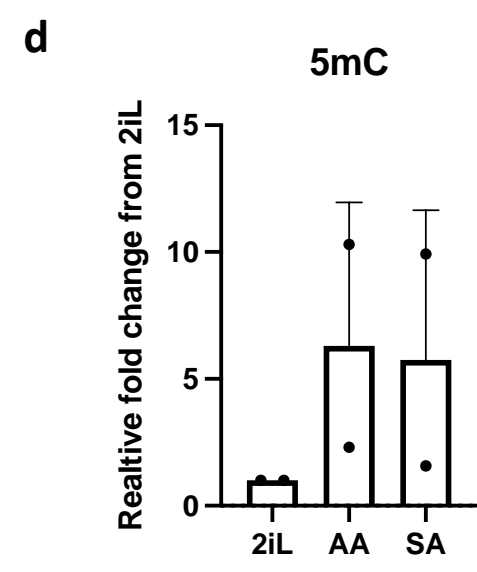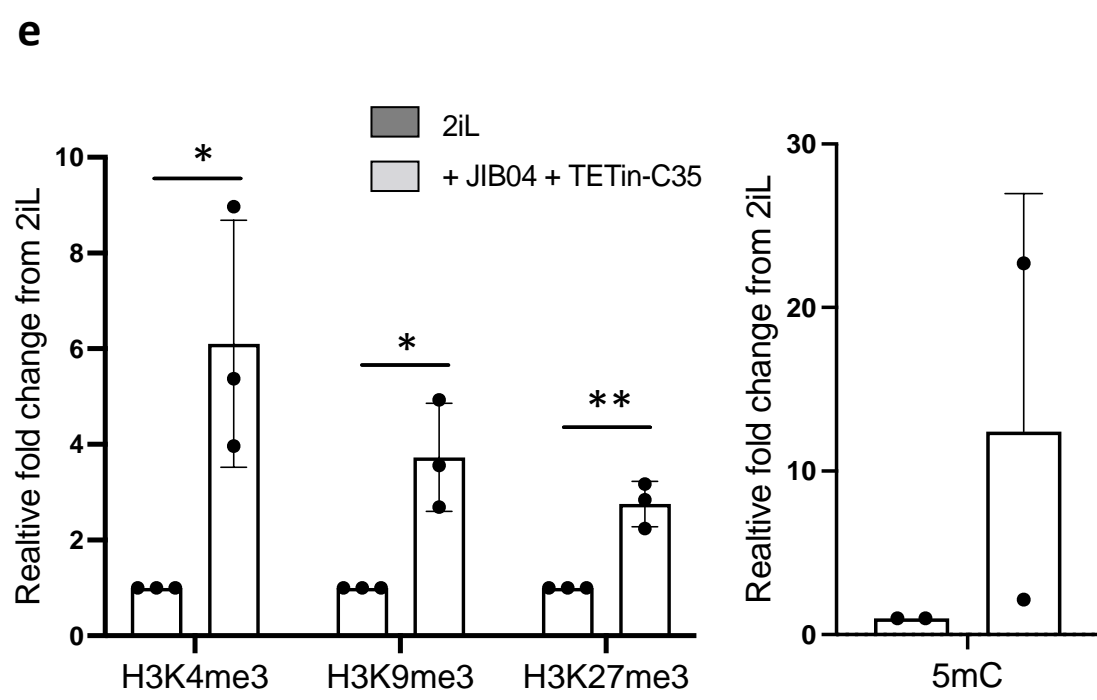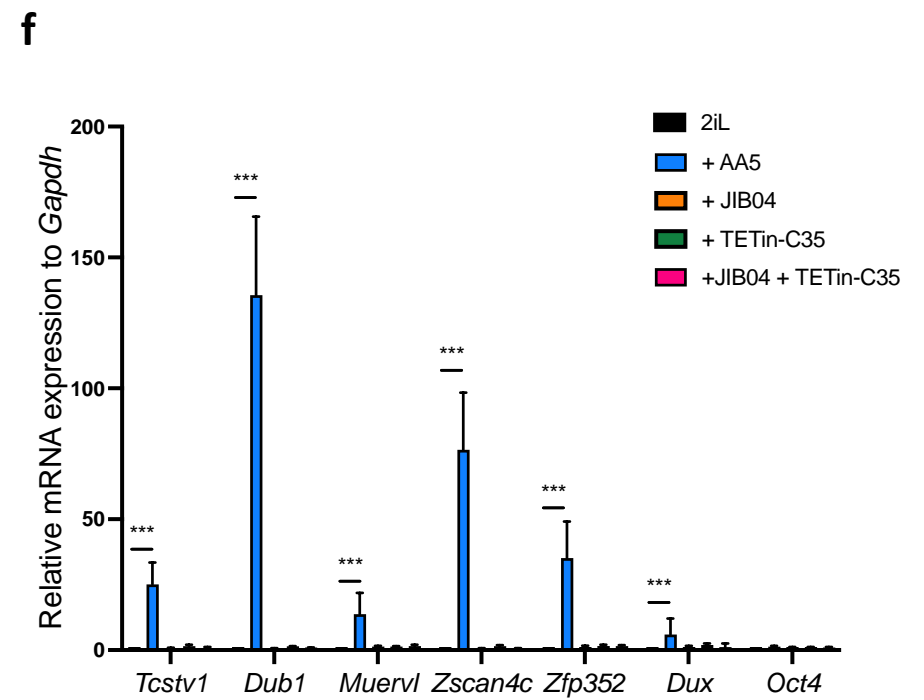

Supplement: supp [file elife-78546-supp-v1.zip]

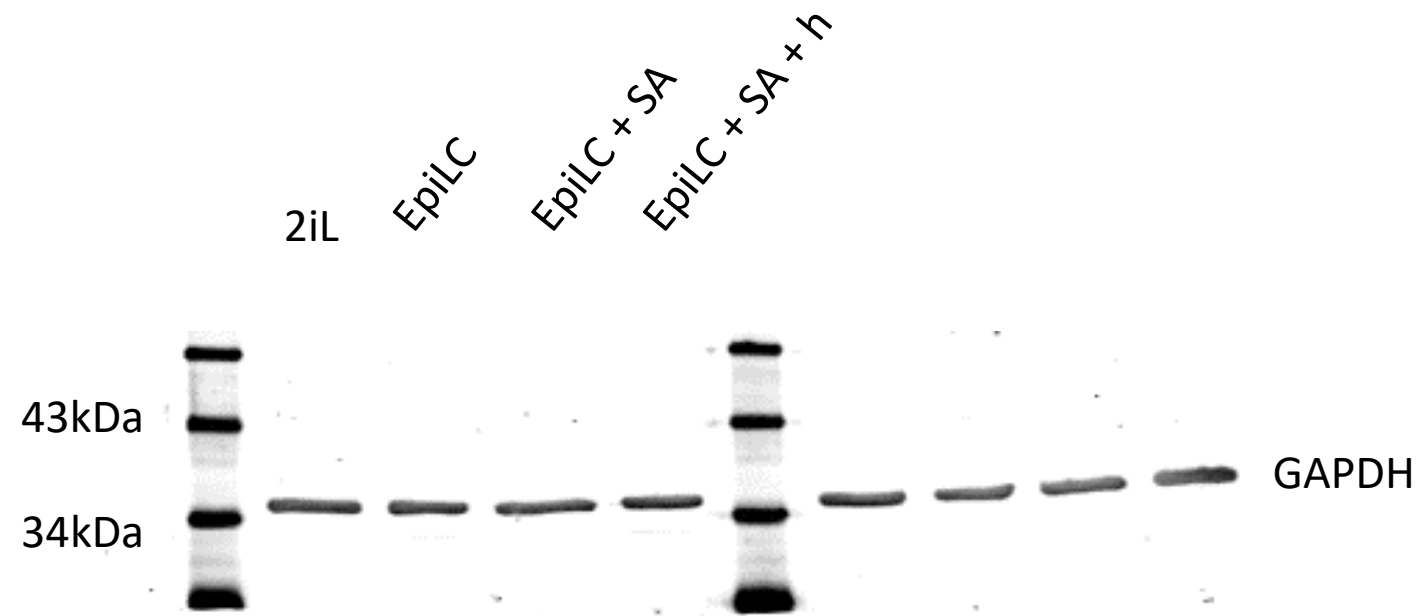

2iL      EpilC      EpilC + SA      EpilC + SA + h

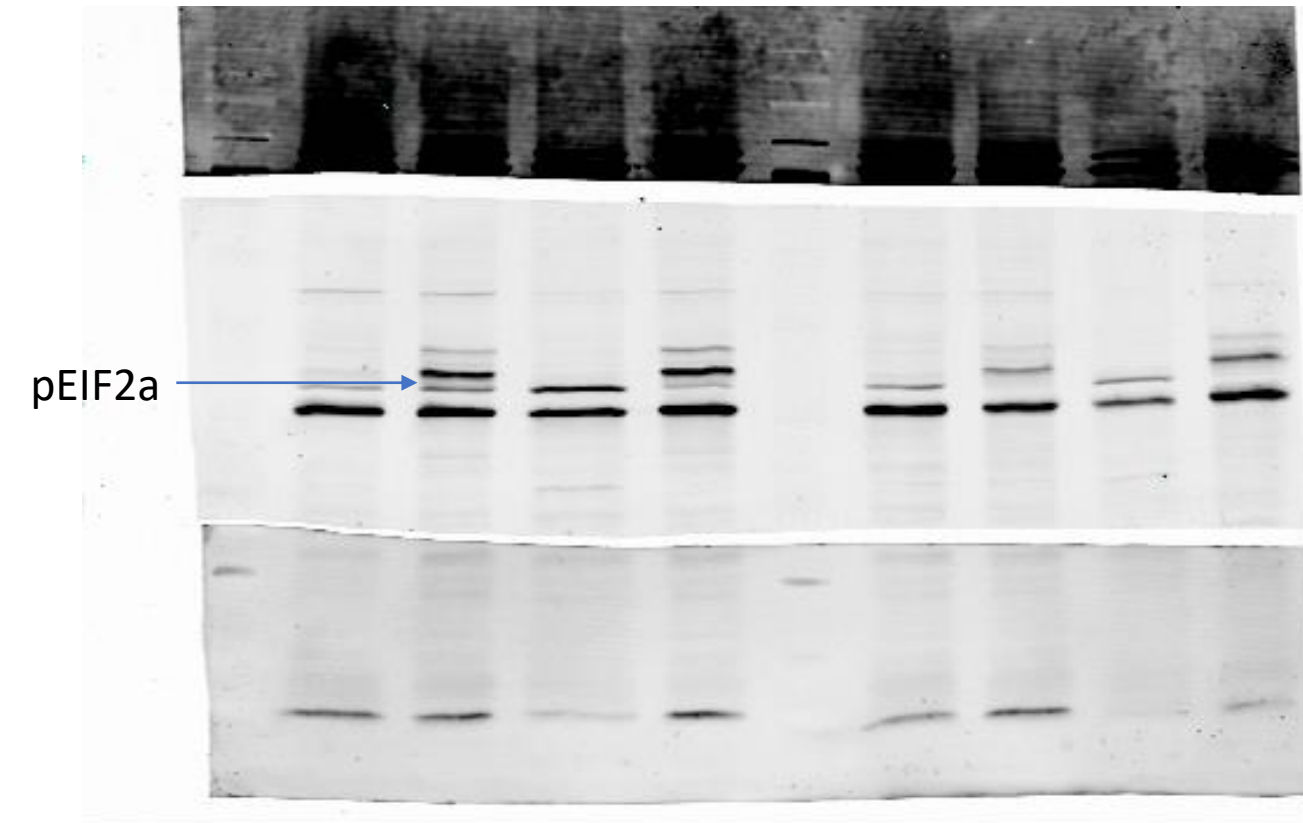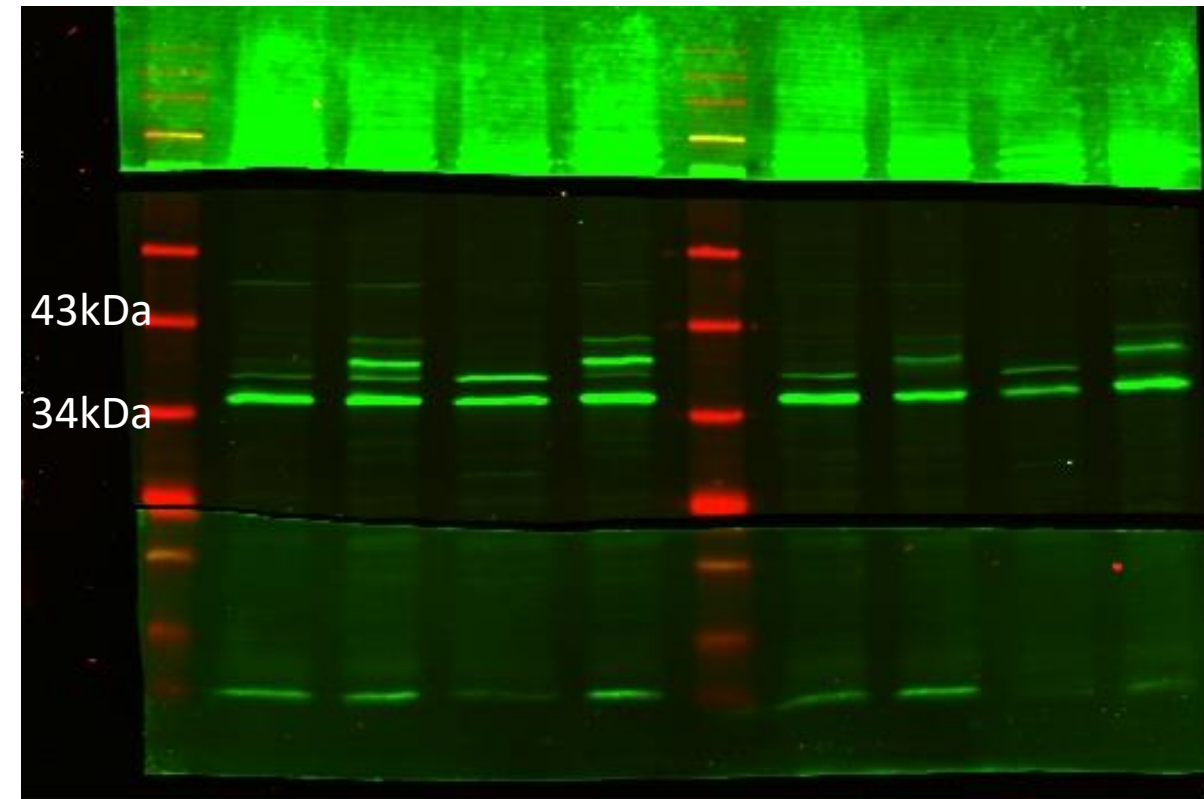

Supplement: supp [file elife-78546-supp-v1.zip]

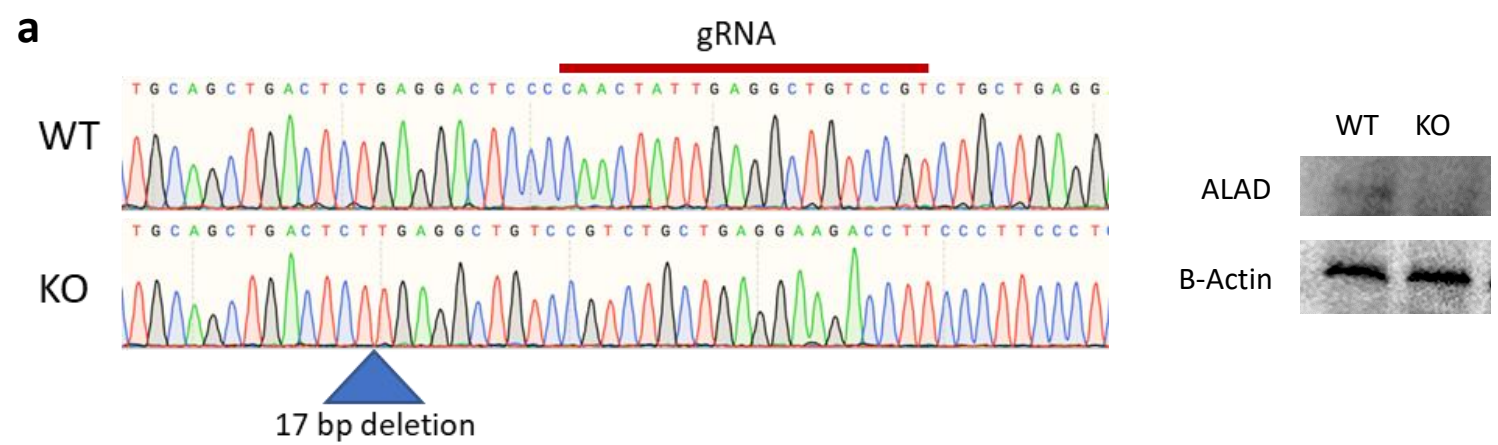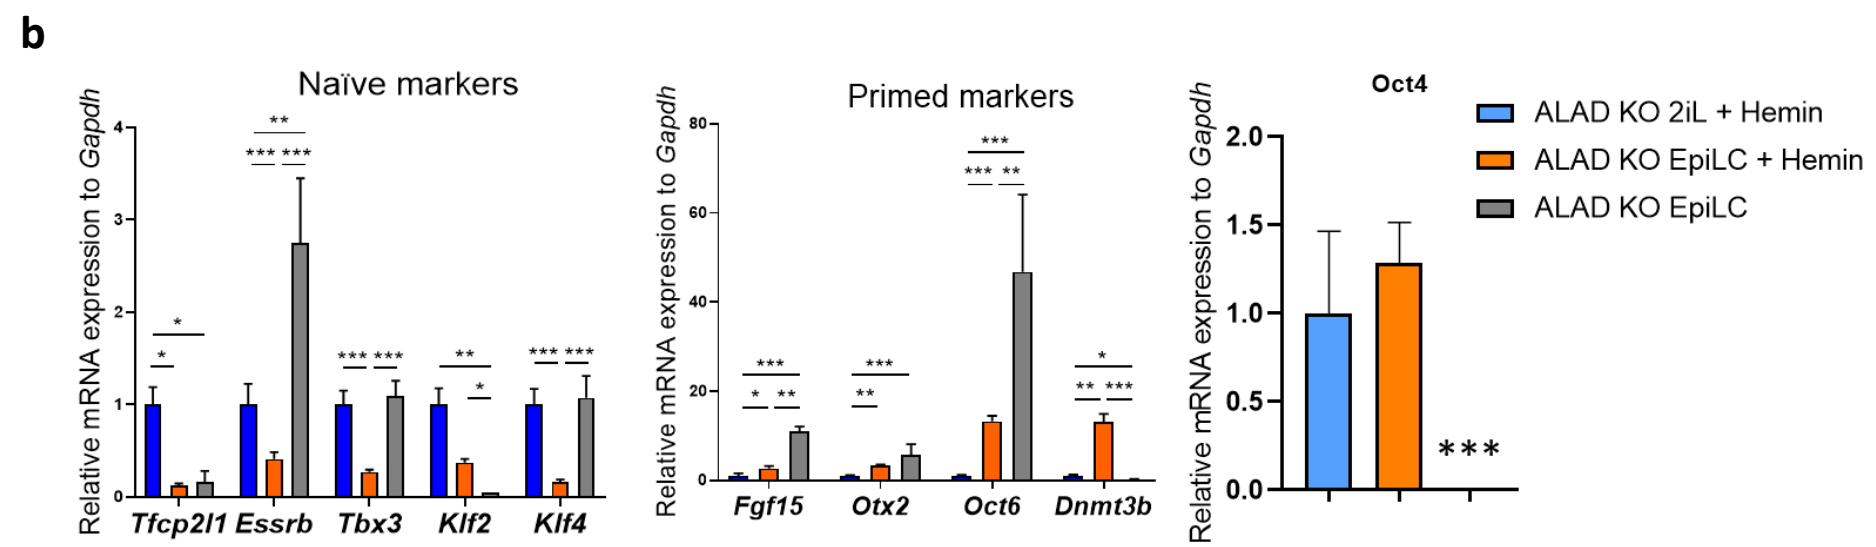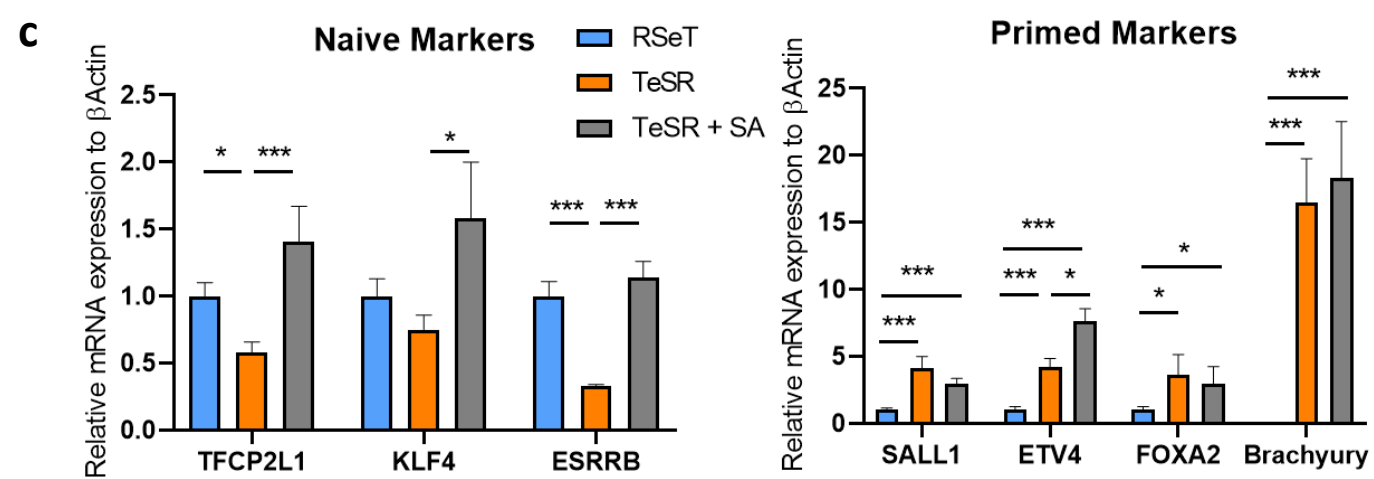

Supplement: supp [file elife-78546-supp-v1.zip]

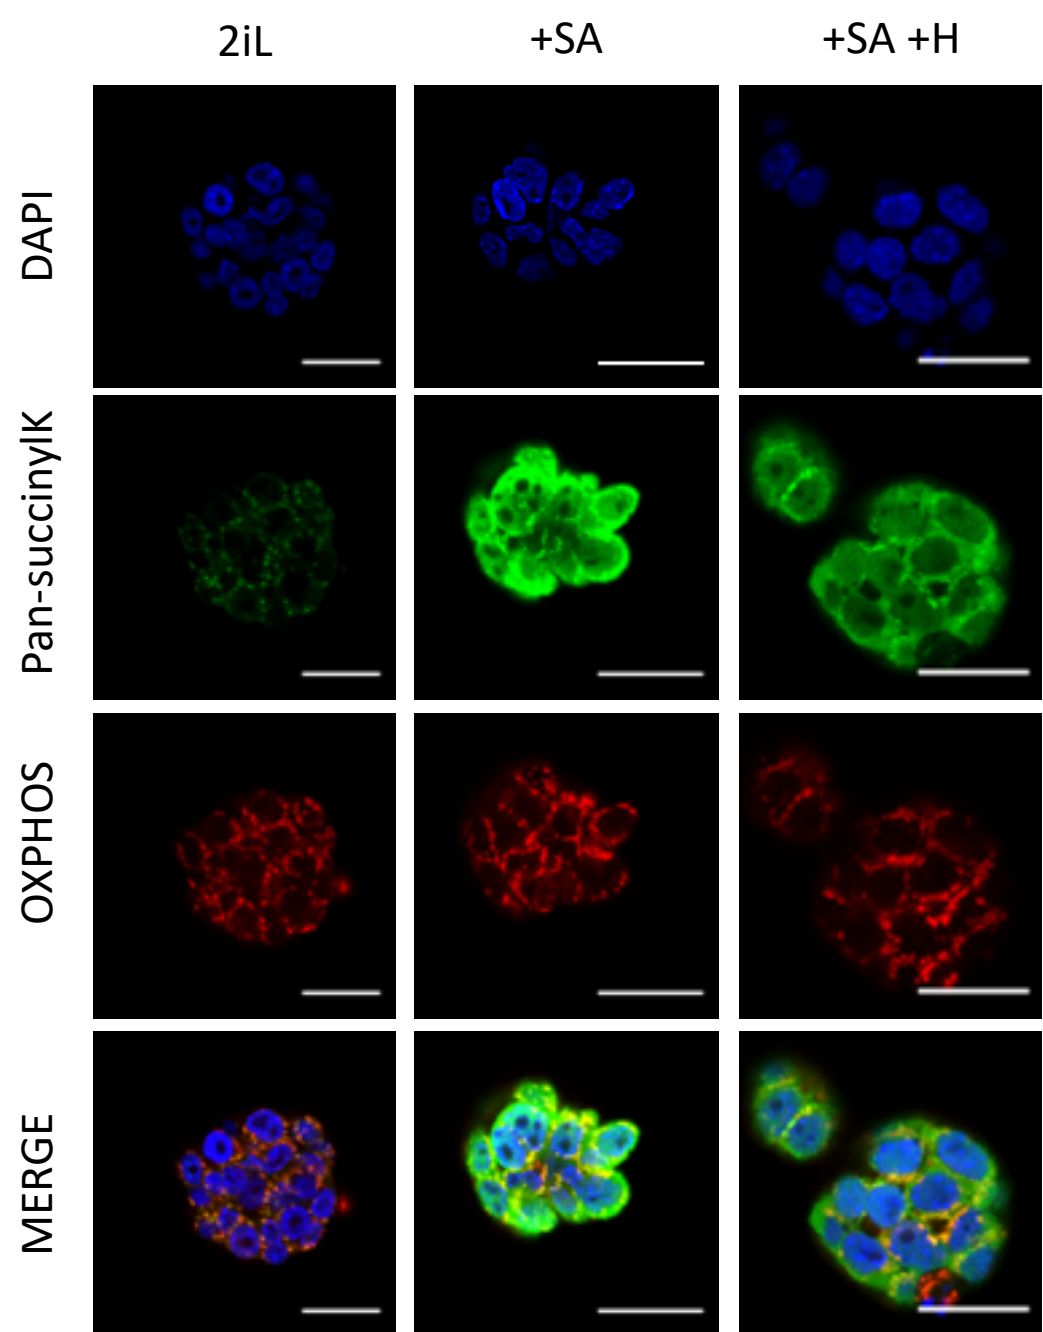

Supplement: supp [file elife-78546-supp-v1.zip]

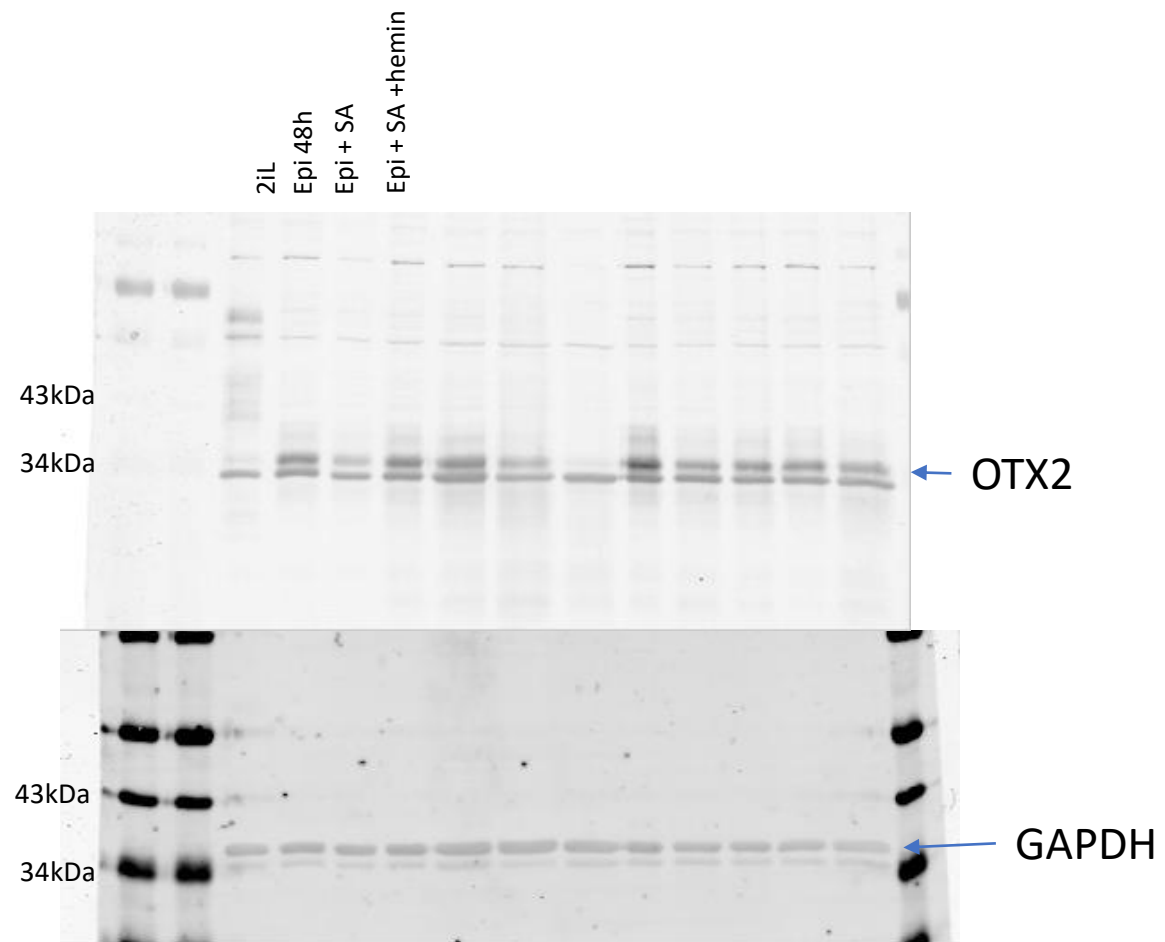

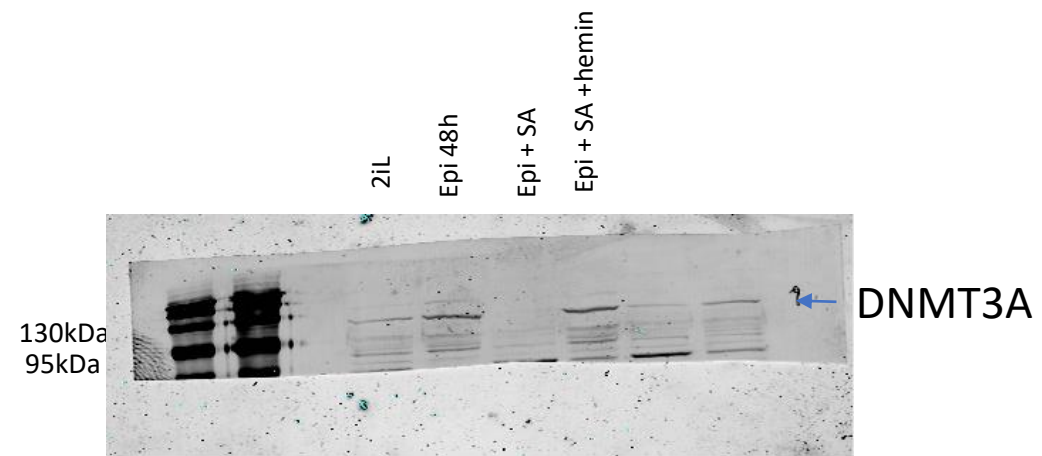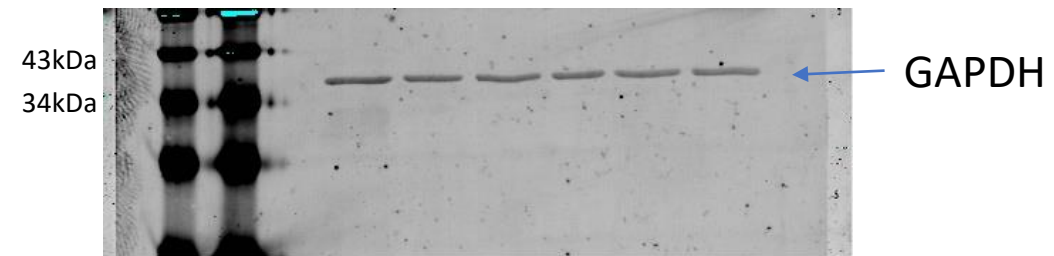

Supplement: supp [file elife-78546-supp-v1.zip]
